# Supplementary material for: Heavy Metals in Notifications of Rapid Alert System for Food and Feed
Source: MDPI journal article supplement (doi:10.3390/ijerph15020365), 2018-02-20
Supplement: s1 [file s1]

# Supplementary Materials: Heavy Metals in Notifications of Rapid Alert System for Food and Feed

Marcin Piłowski

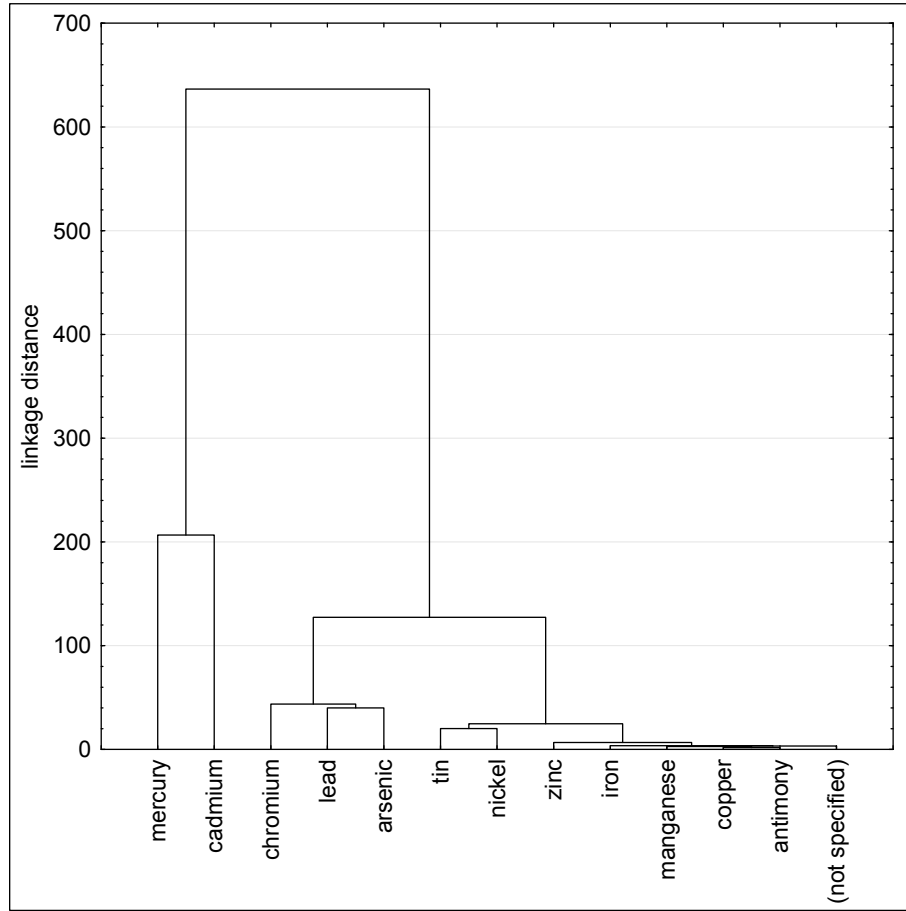

(a)

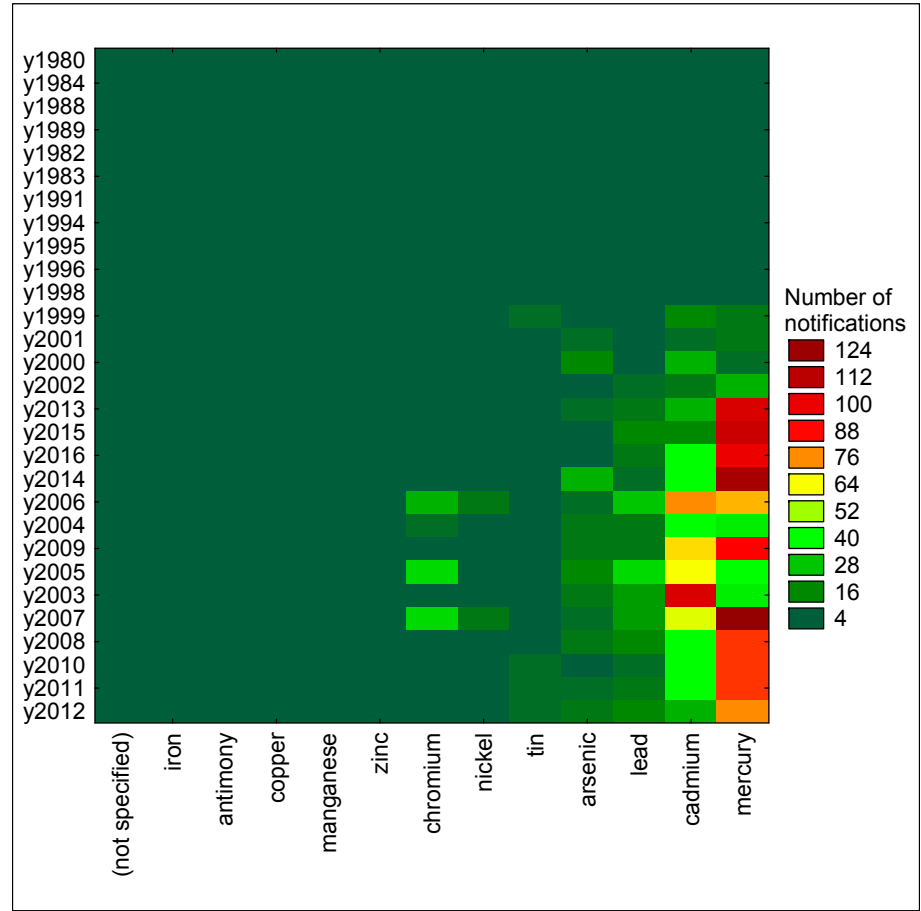

(b)

Figure S1: Similarities of RASFF notifications on heavy metals and year within food: (a) joining; (b) two-way joining.

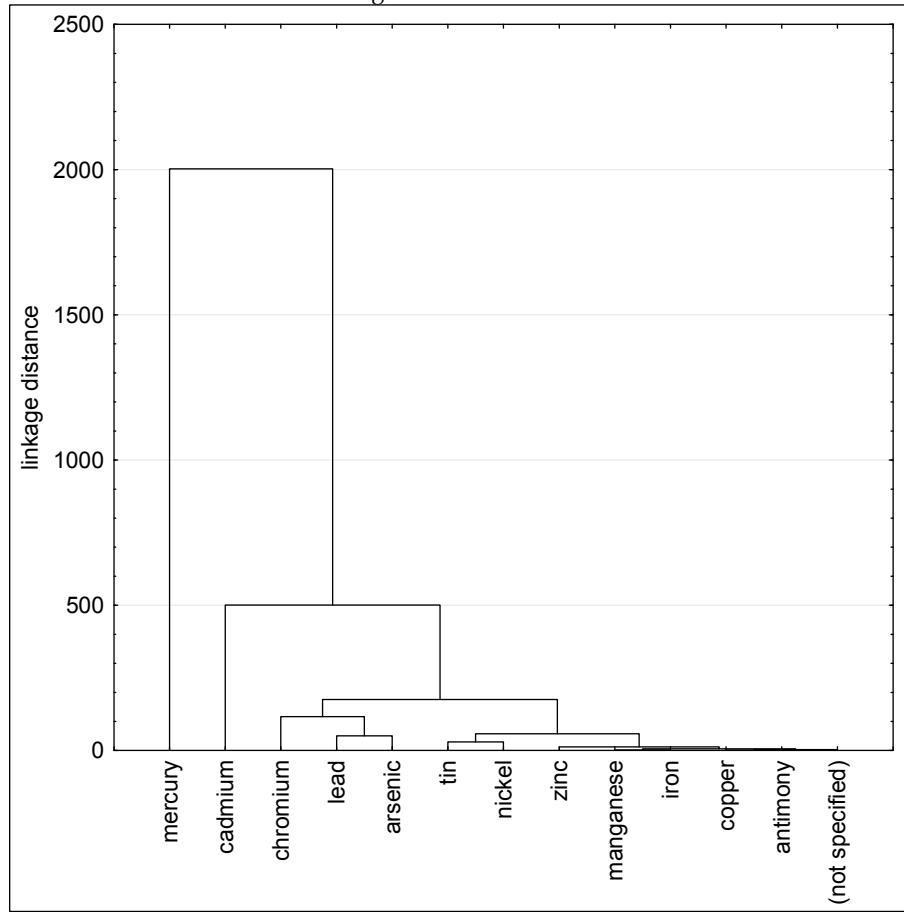

(a)

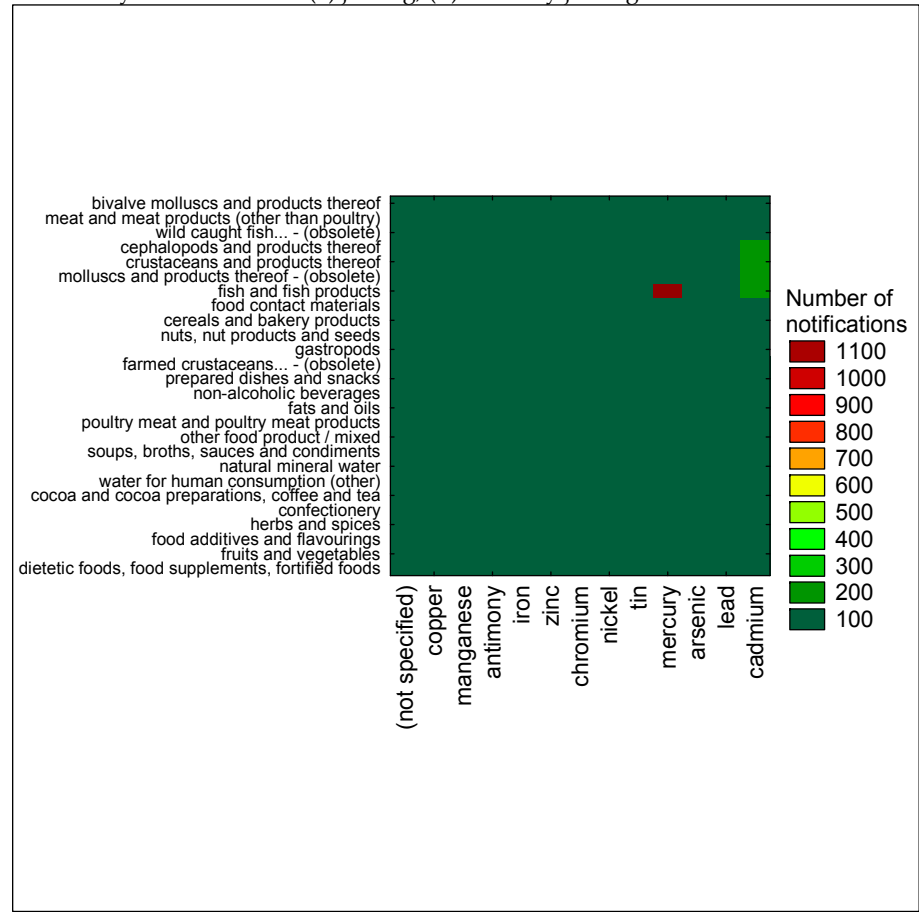

(b)

Figure S2: Similarities of RASFF notifications on heavy metals and product category within food: (a) joining; (b) two-way joining.

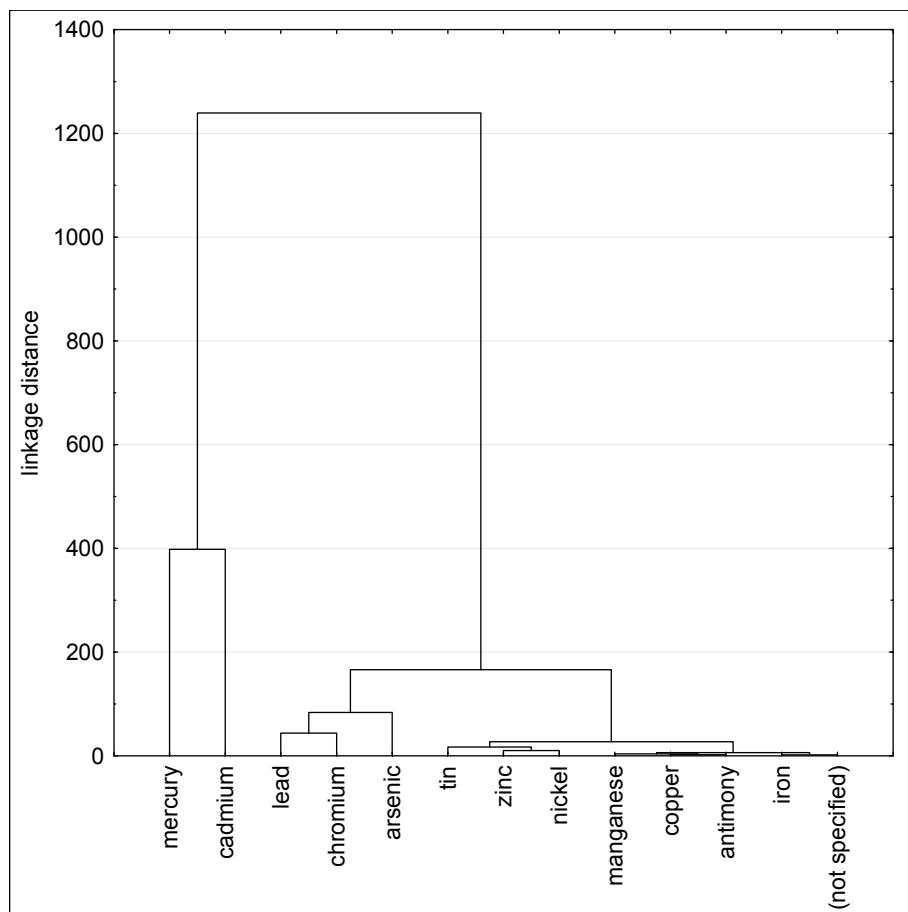

(a)

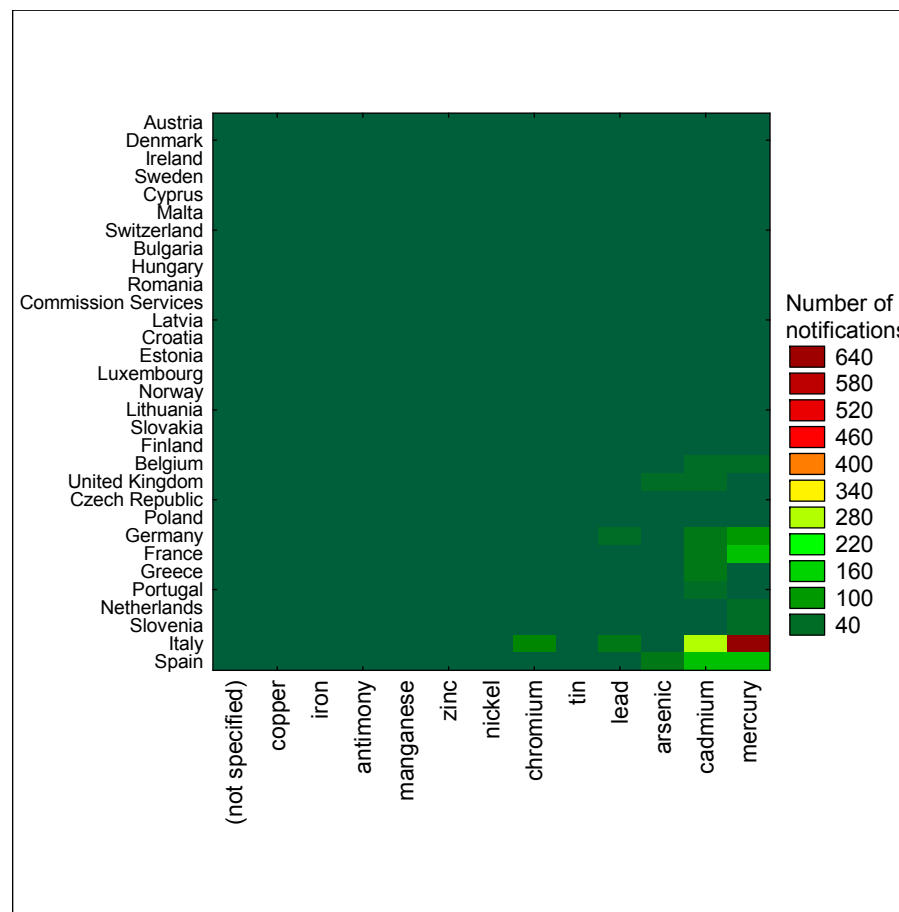

(b)

Figure S3: Similarities of RASFF notifications on heavy metals and notifying country within food: (a) joining; (b) two-way joining.

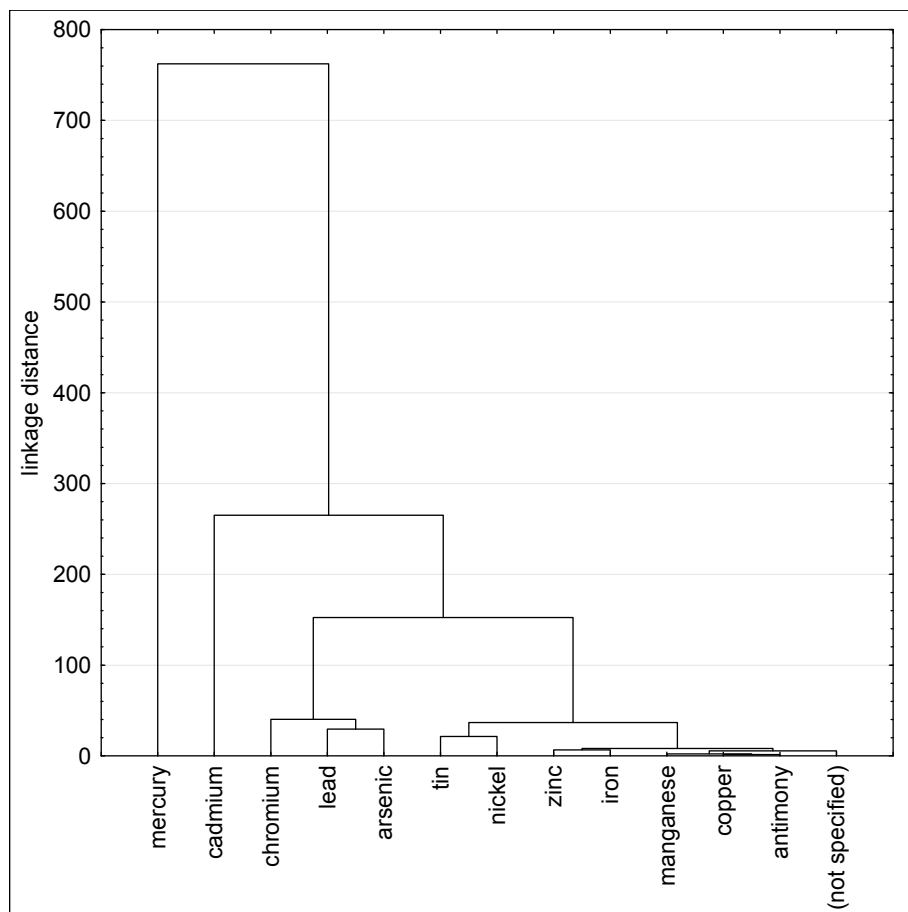

(a)

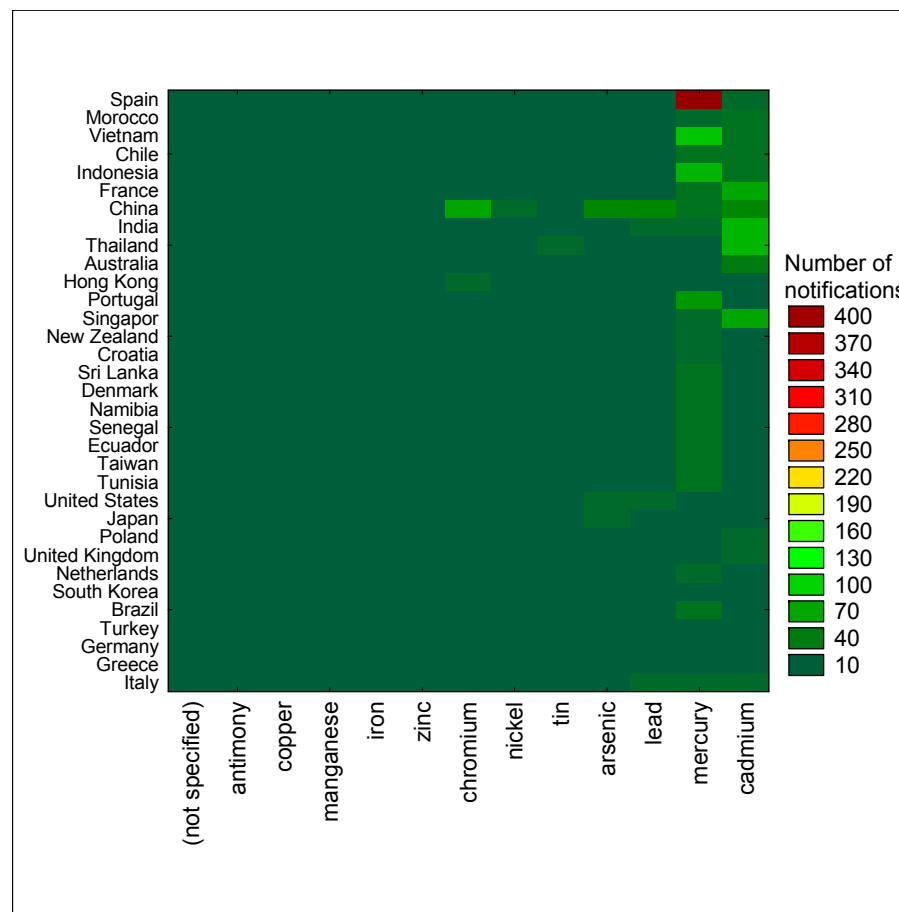

(b)

Figure S4: Similarities of RASFF notifications on heavy metals and origin country within food: (a) joining; (b) two-way joining.

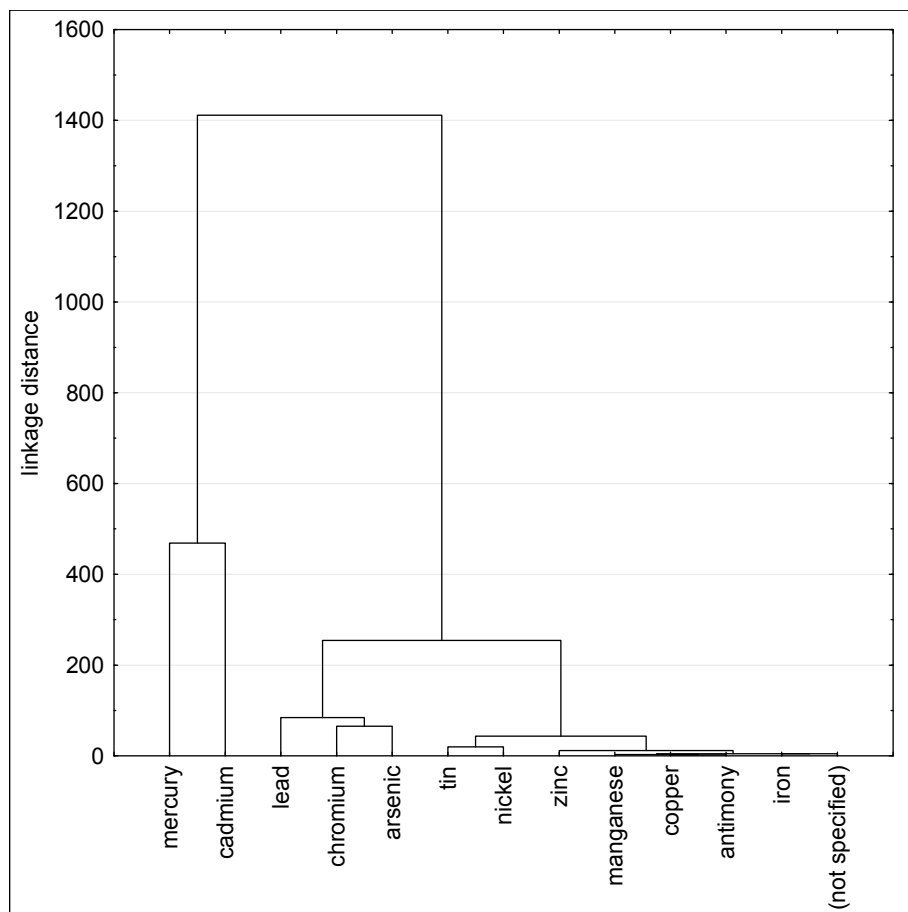

(a)

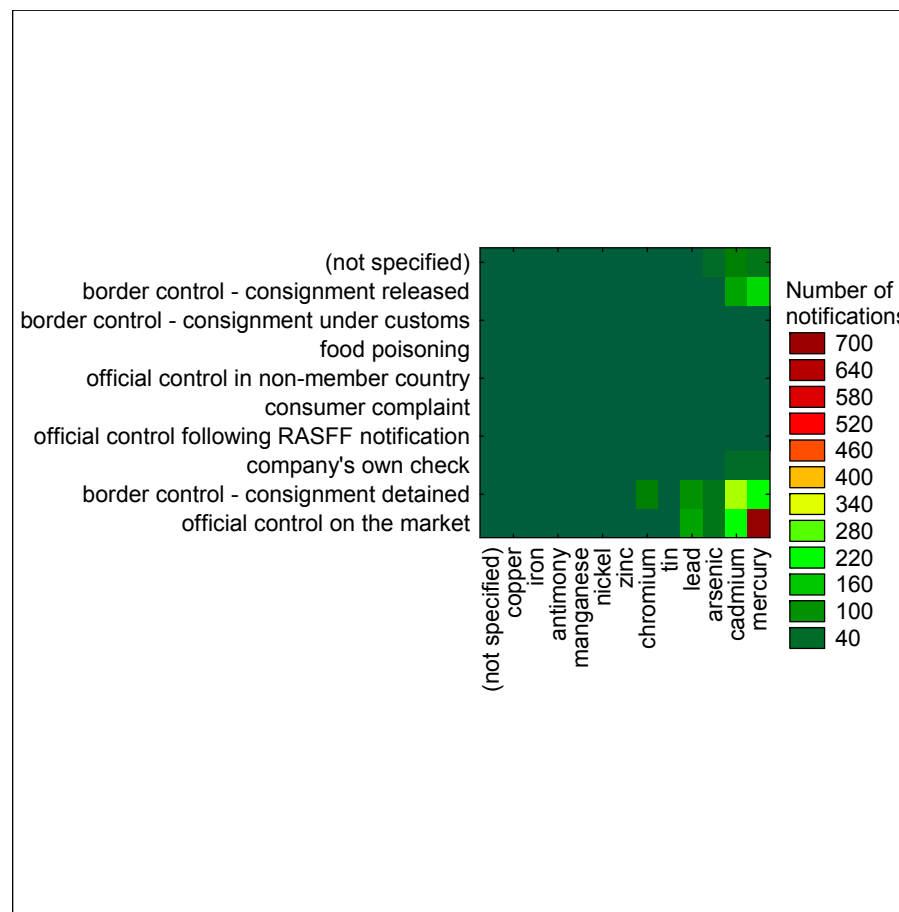

(b)

Figure S5: Similarities of RASFF notifications on heavy metals and notification basis within food: (a) joining; (b) two-way joining.

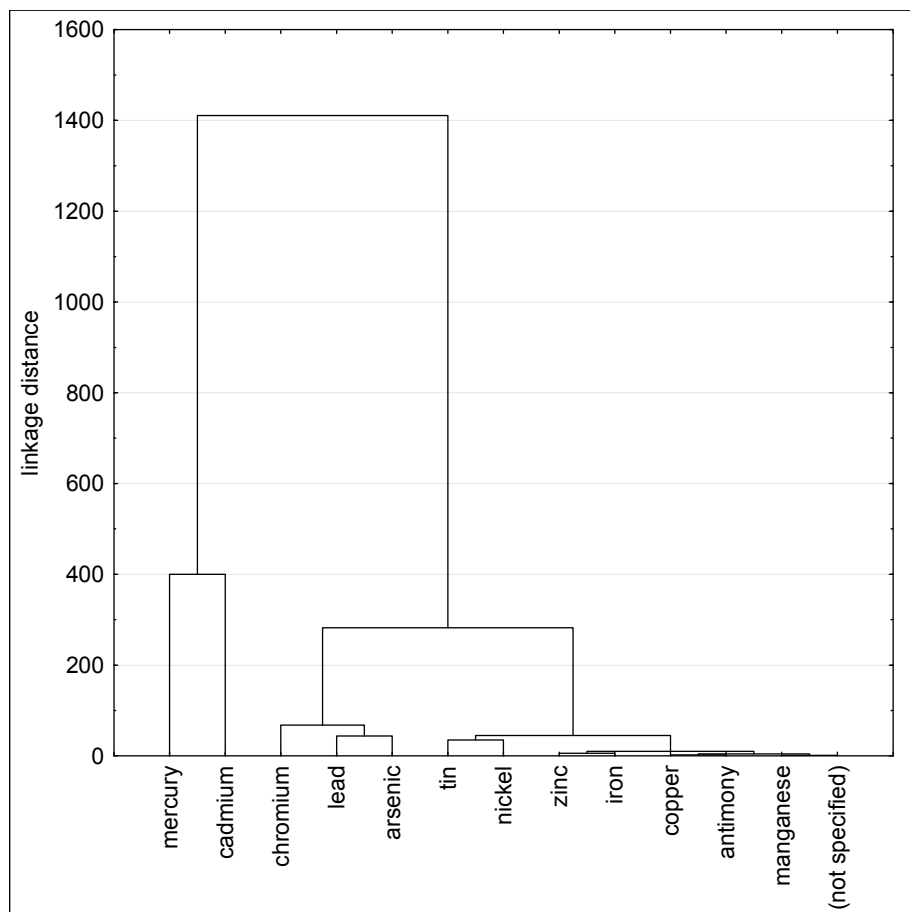

(a)

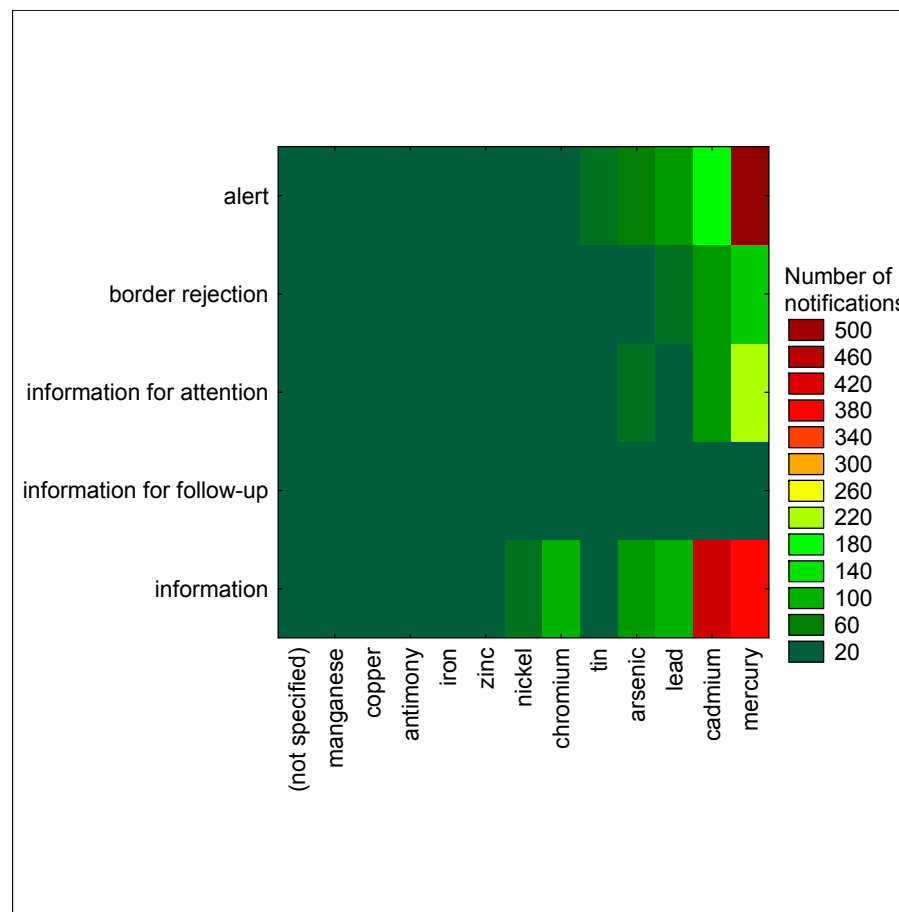

(b)

Figure S6: Similarities of RASFF notifications on heavy metals and notification type within food: (a) joining; (b) two-way joining.

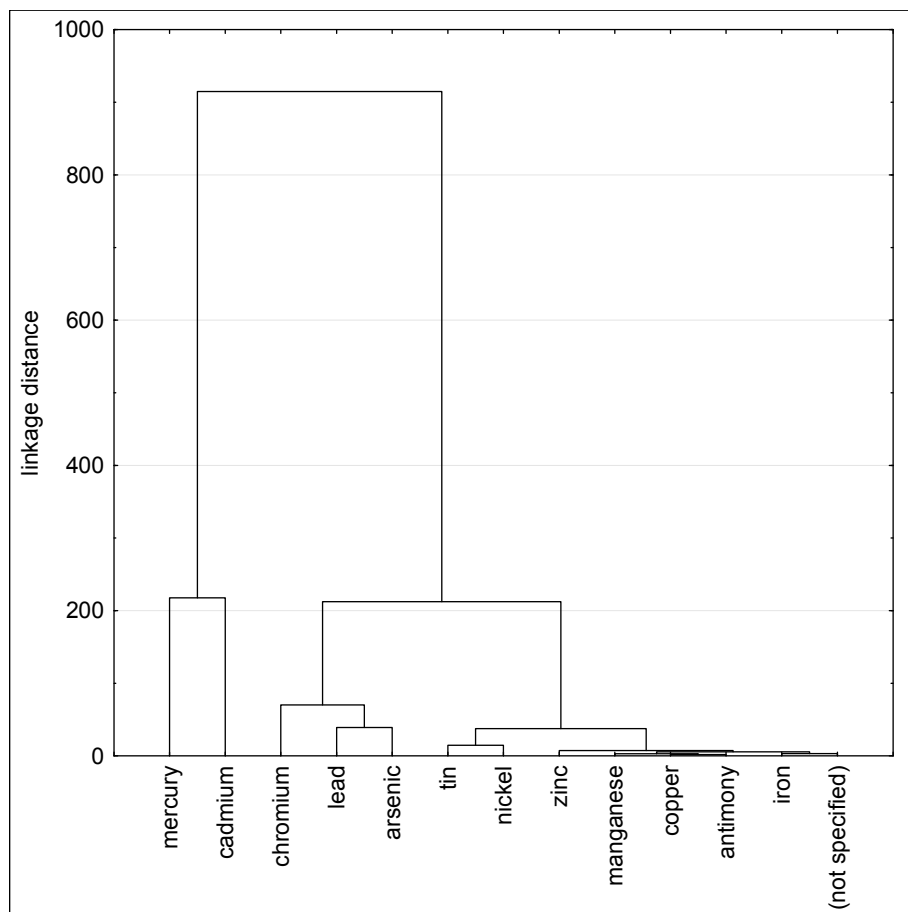

(a)

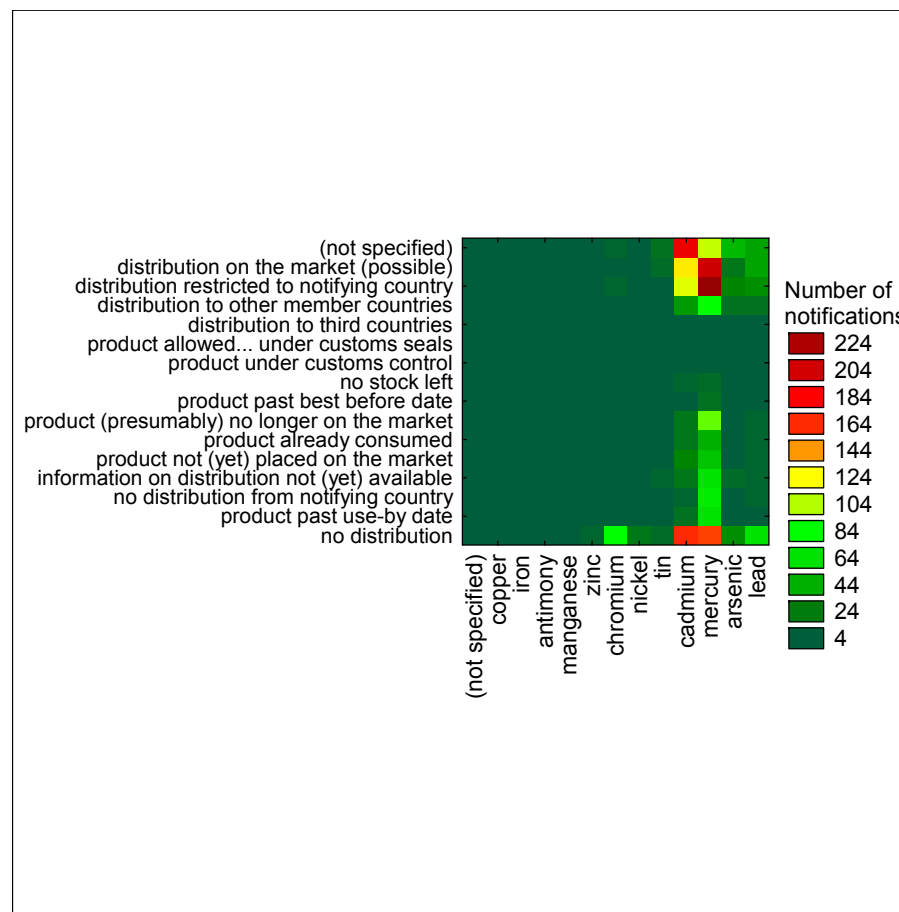

(b)

Figure S7: Similarities of RASFF notifications on heavy metals and distribution status within food: (a) joining; (b) two-way joining.

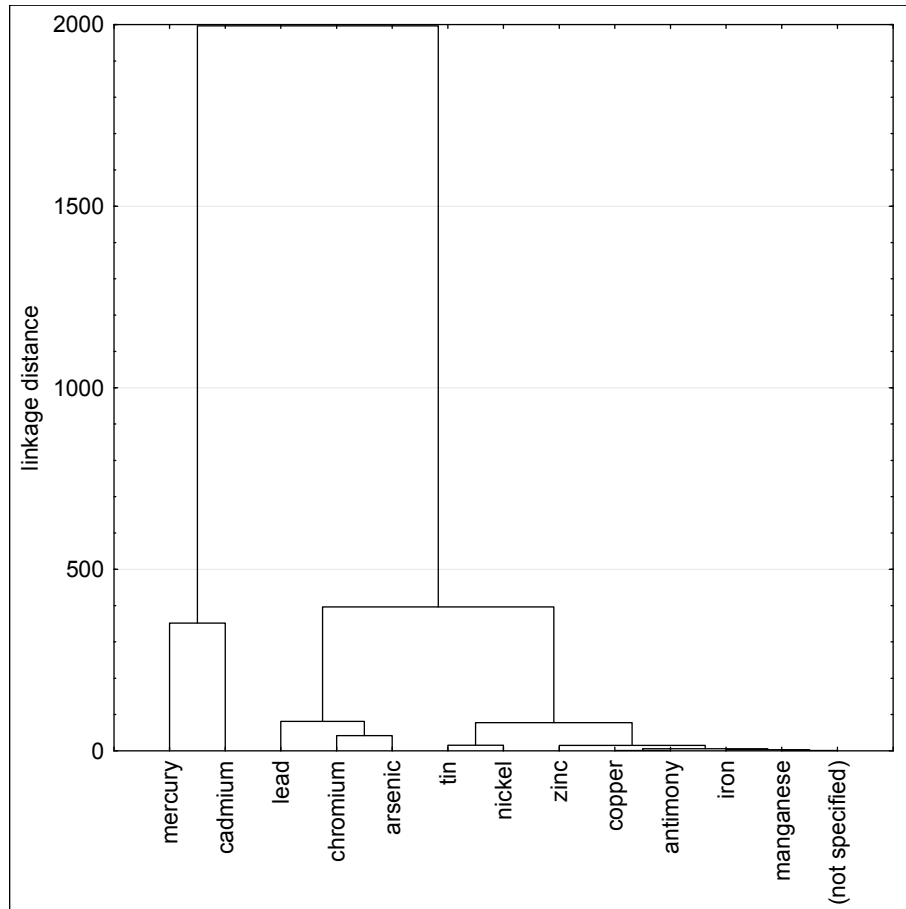

(a)

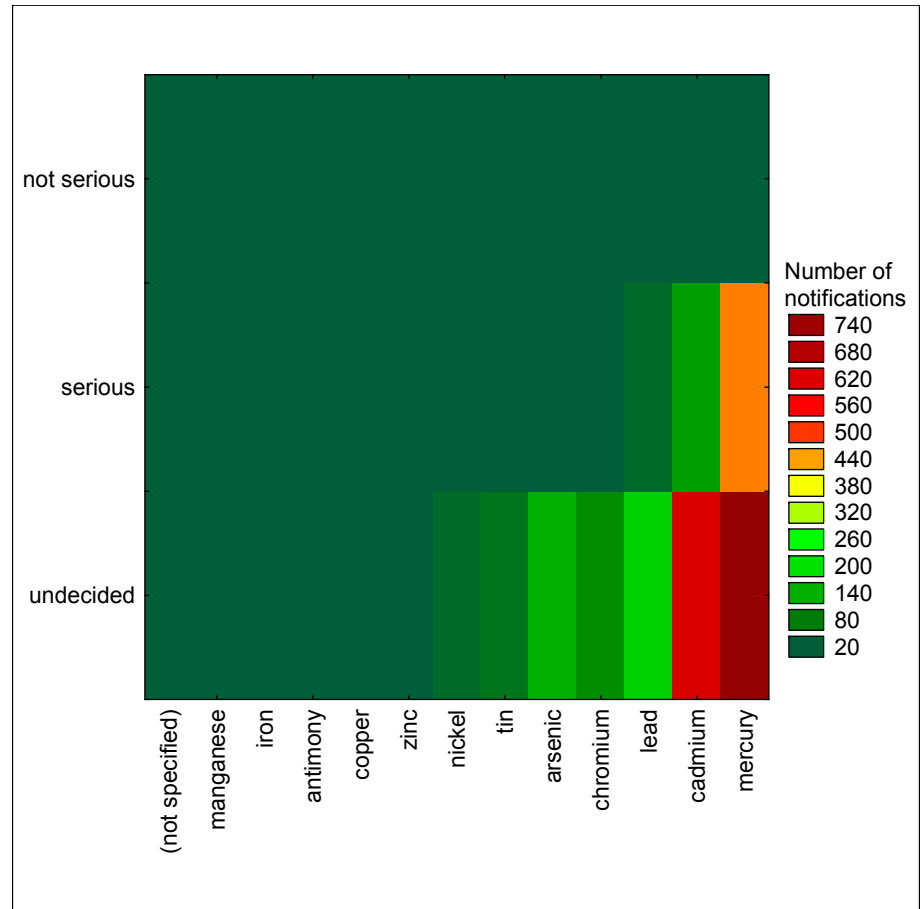

(b)

Figure S8: Similarities of RASFF notifications on heavy metals and risk decision within food: (a) joining; (b) two-way joining.



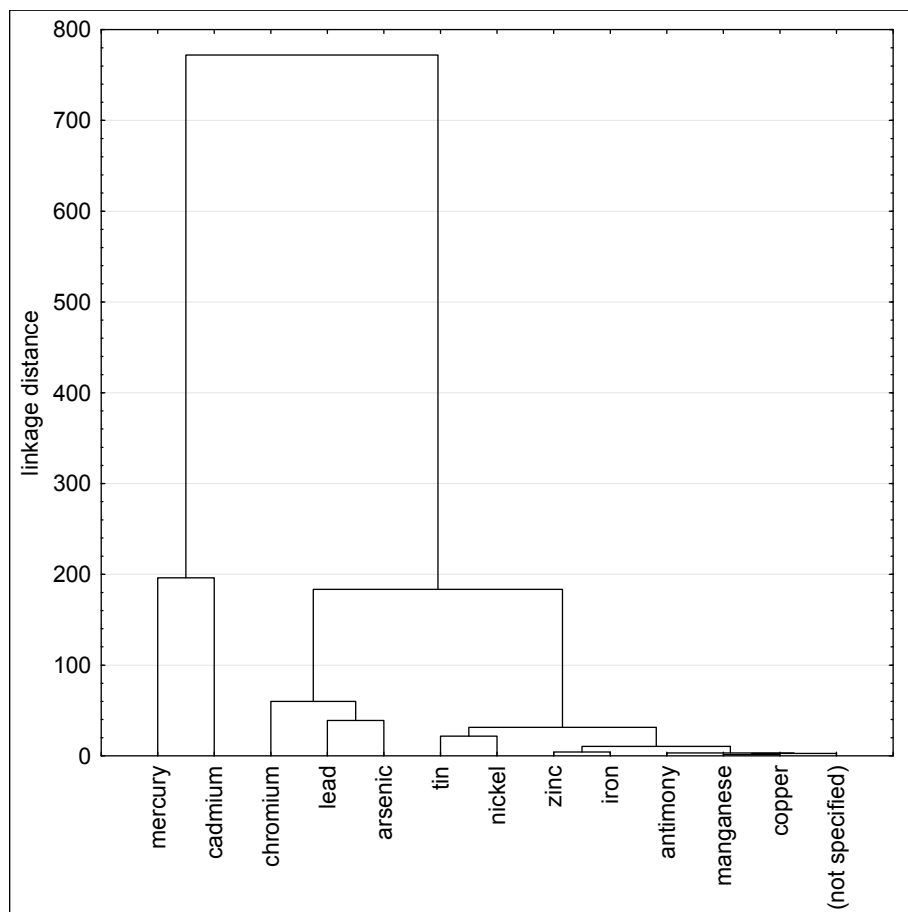

(a)

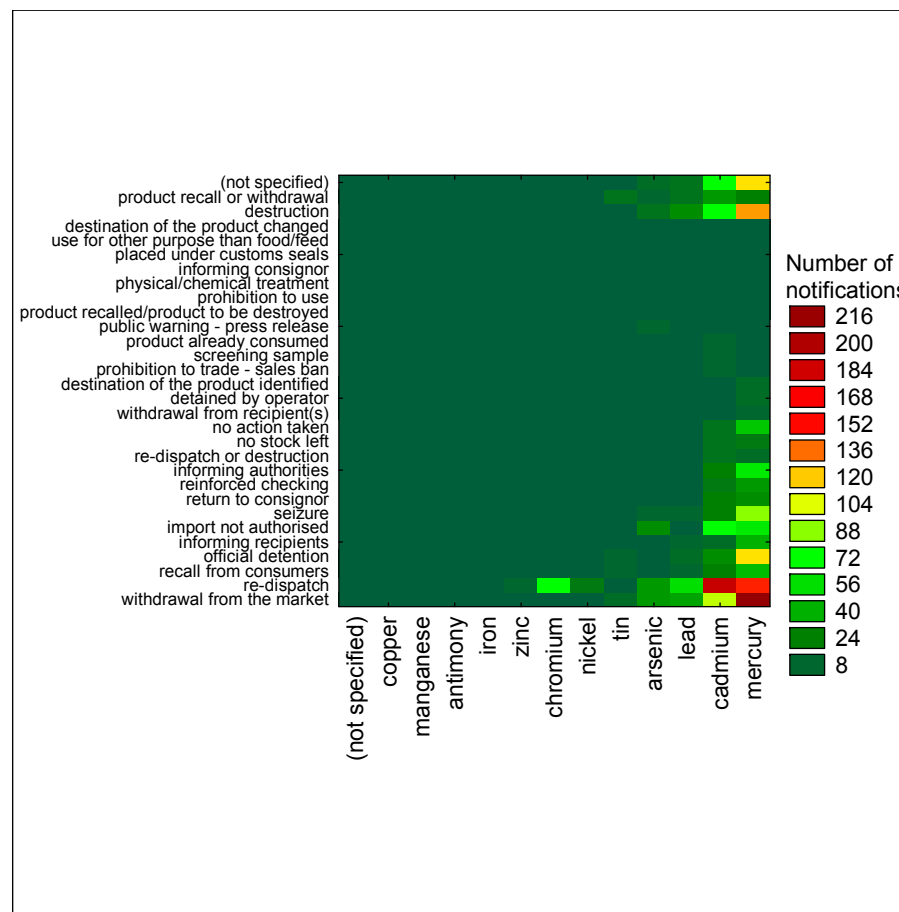

(b)

Figure S9: Similarities of RASFF notifications on heavy metals and action taken within food: (a) joining; (b) two-way joining.

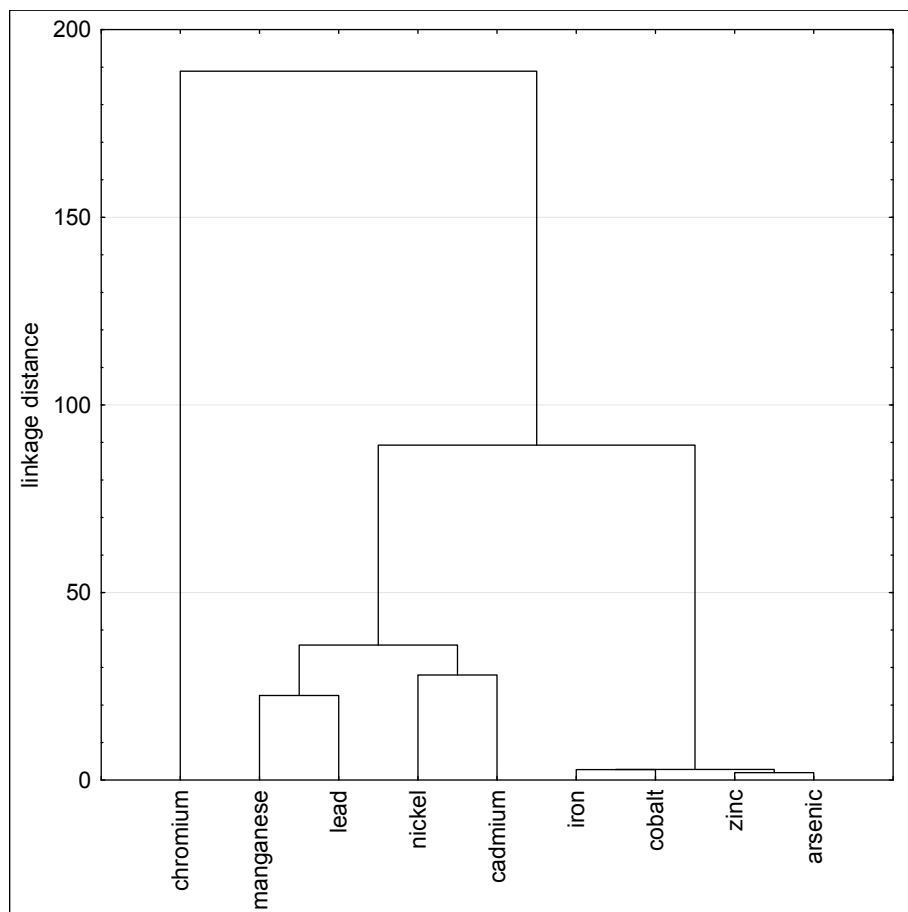

(a)

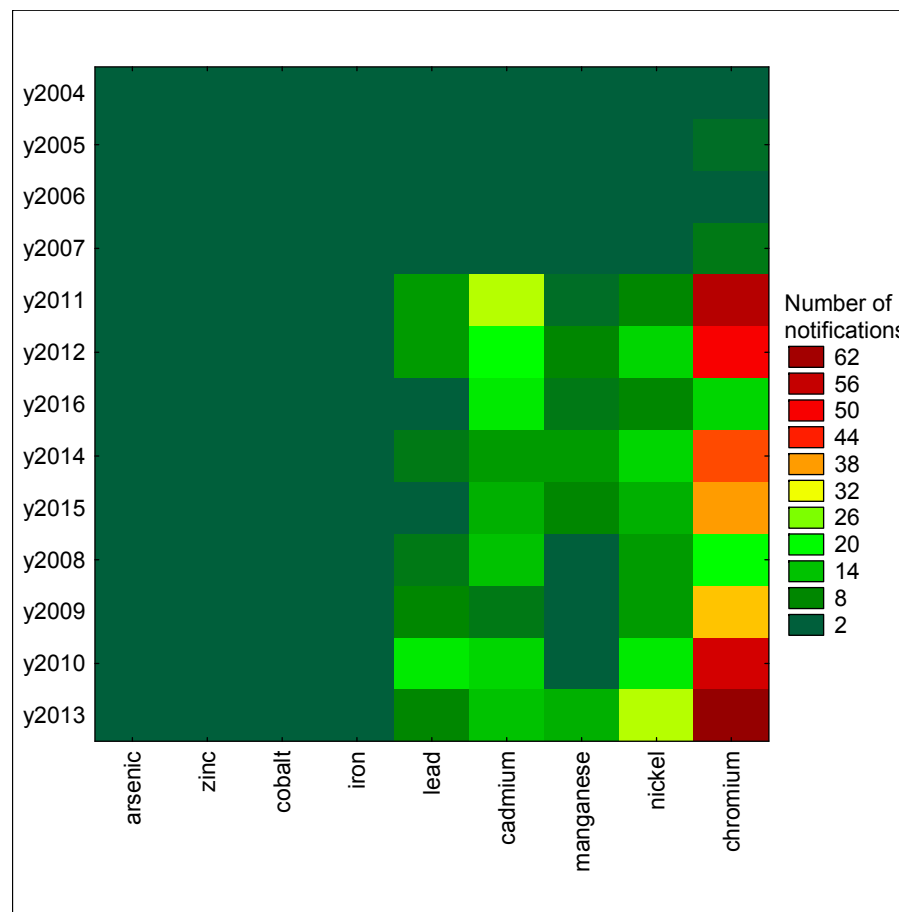

(b)

Figure S10: Similarities of RASFF notifications on heavy metals and year within food contact material: (a) joining; (b) two-way joining.

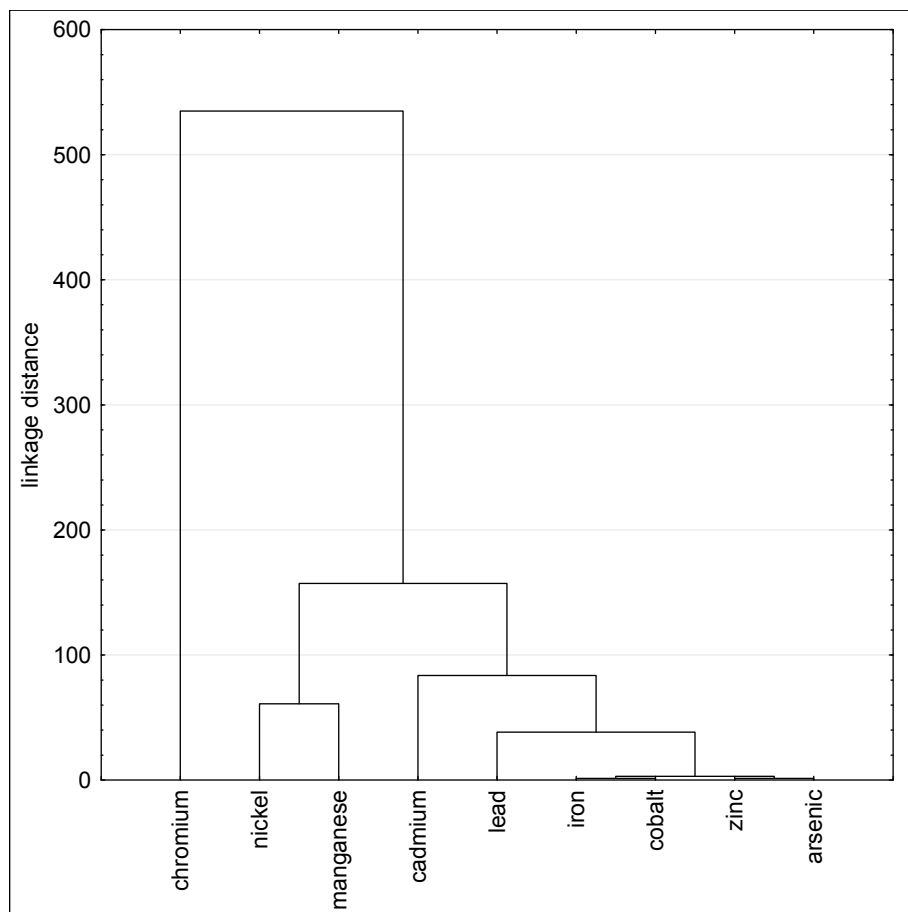

(a)

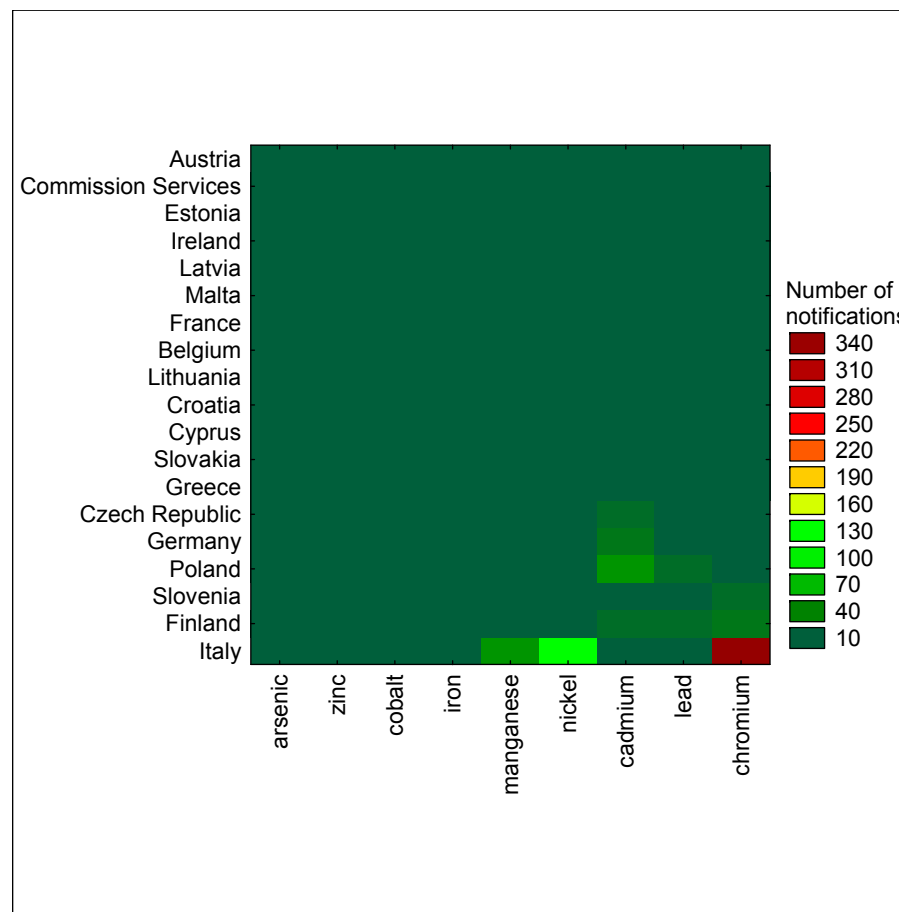

(b)

Figure S11: Similarities of RASFF notifications on heavy metals and notifying country within food contact material: (a) joining; (b) two-way joining.

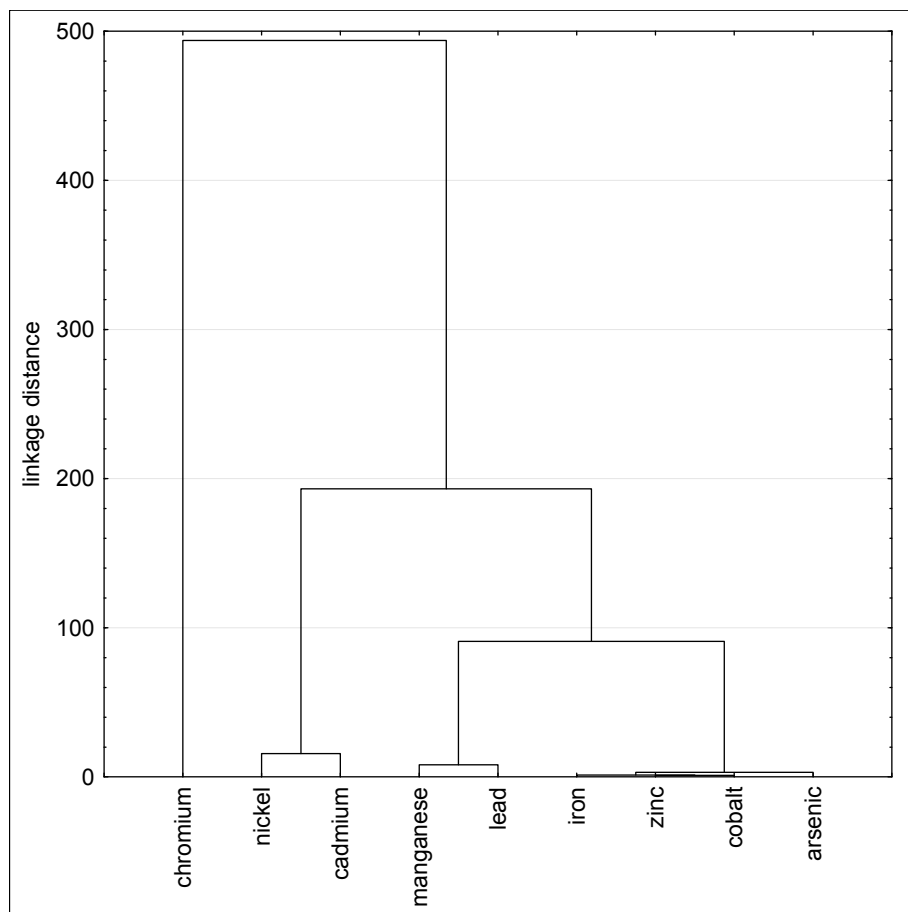

(a)

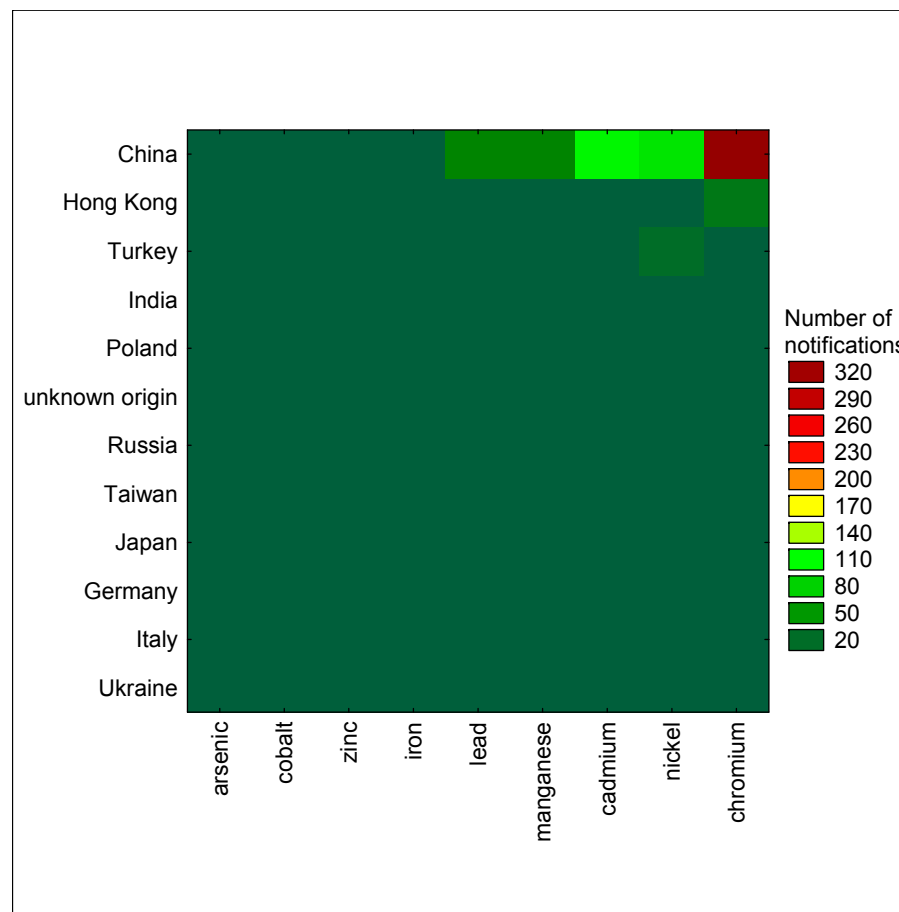

(b)

Figure S12: Similarities of RASFF notifications on heavy metals and origin country within food contact material: (a) joining; (b) two-way joining.

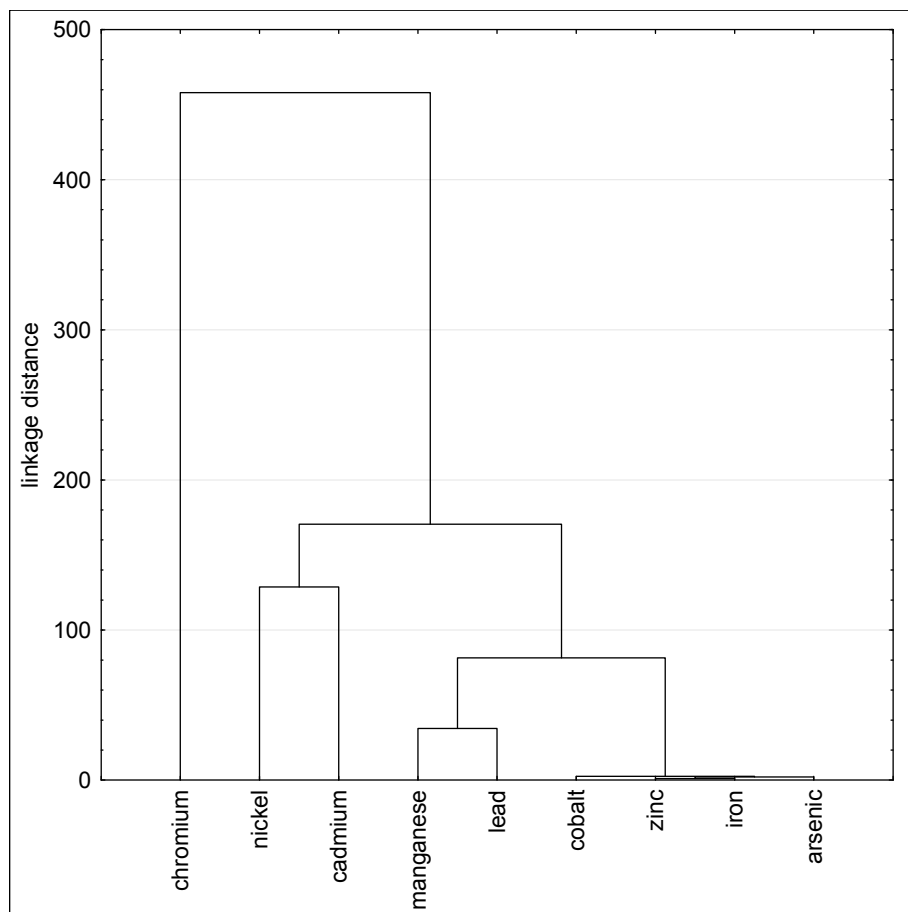

(a)

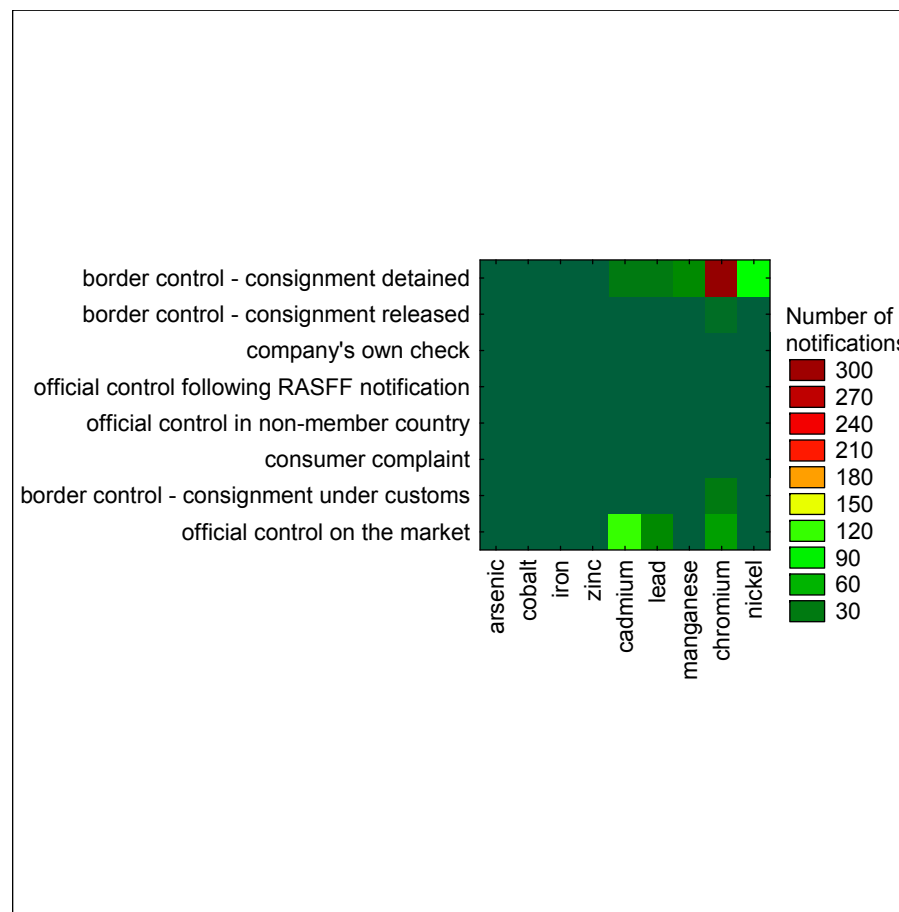

(b)

Figure S13: Similarities of RASFF notifications on heavy metals and notification basis within food contact material: (a) joining; (b) two-way joining.

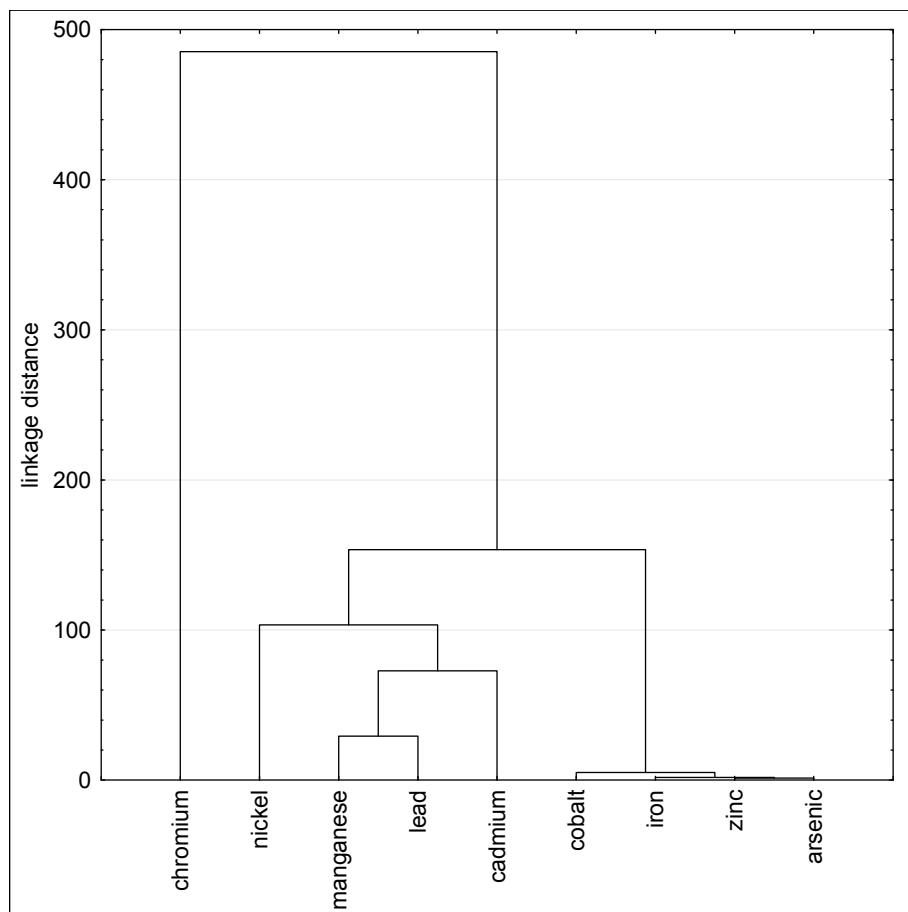

(a)

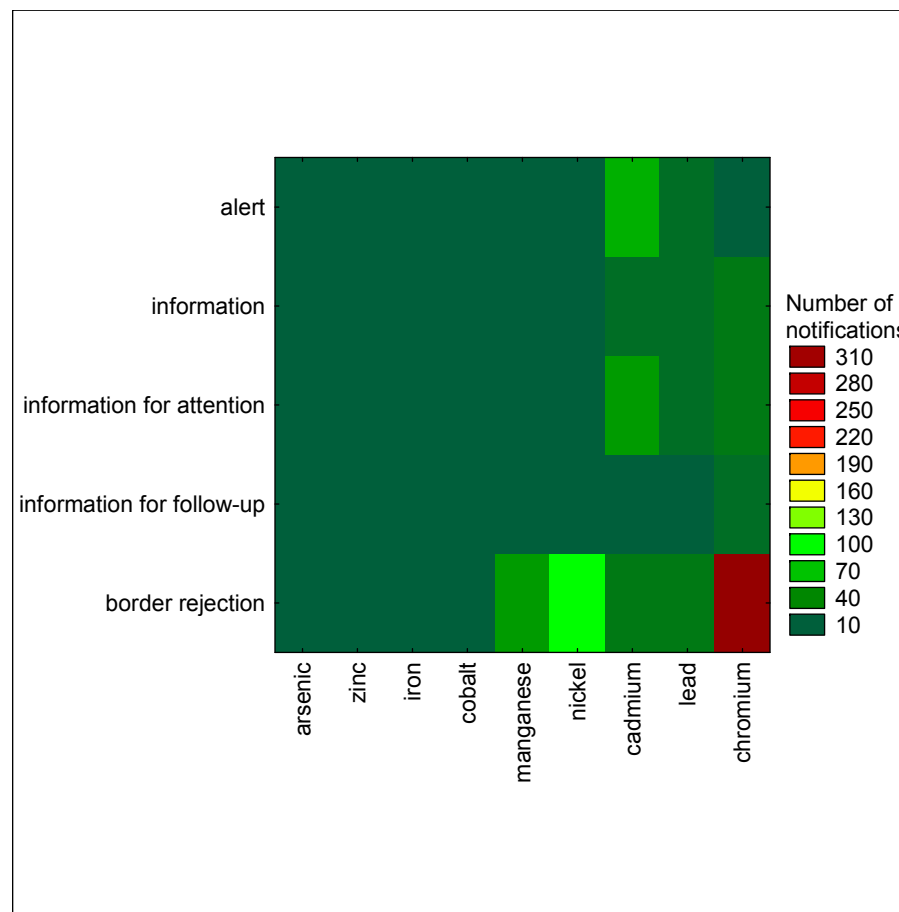

(b)

Figure S14: Similarities of RASFF notifications on heavy metals and notification type within food contact material: (a) joining; (b) two-way joining.

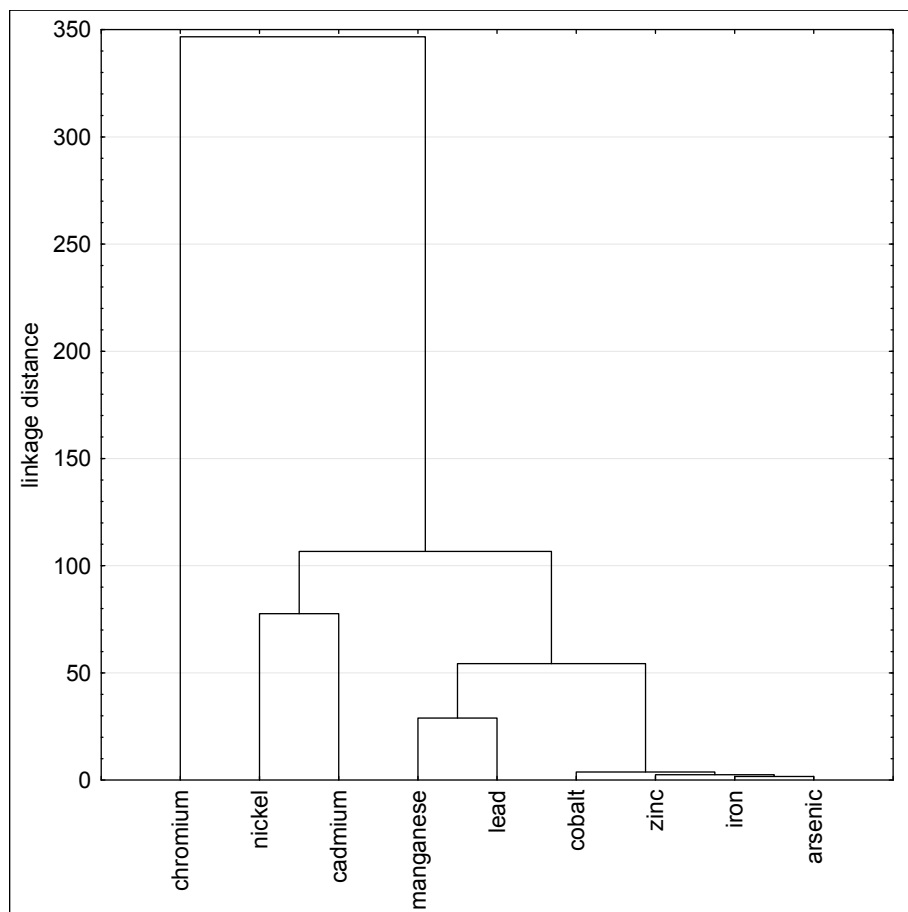

(a)

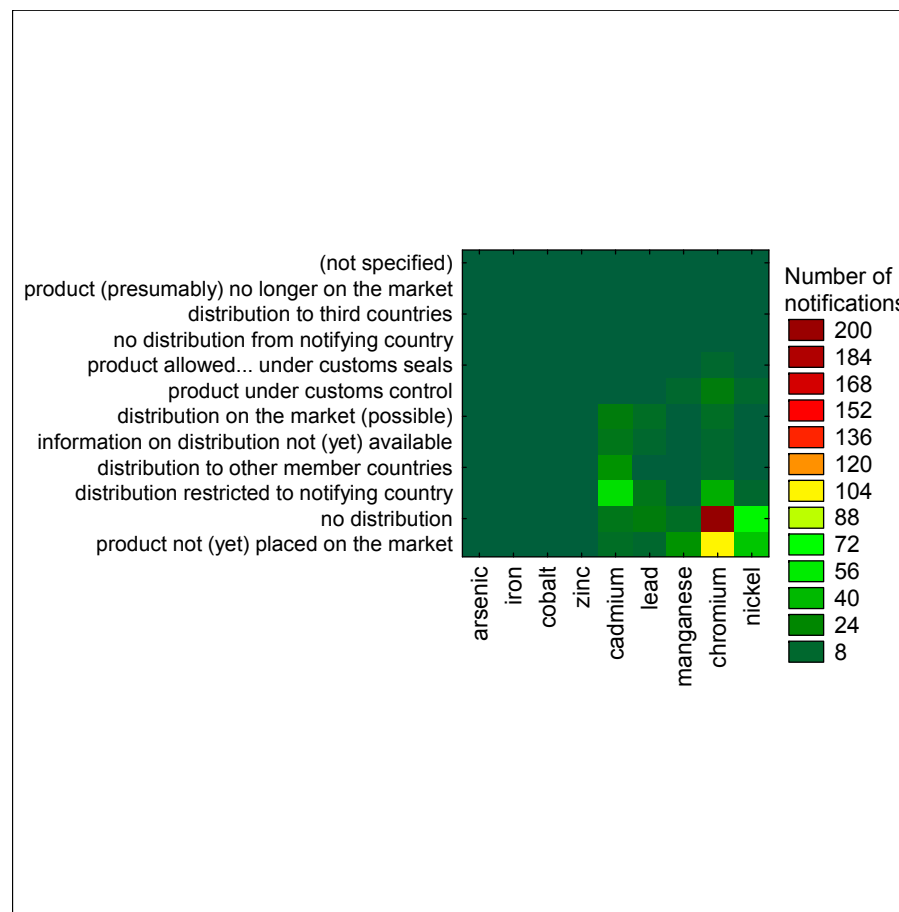

(b)

Figure S15: Similarities of RASFF notifications on heavy metals and distribution status within food contact material: (a) joining; (b) two-way joining.

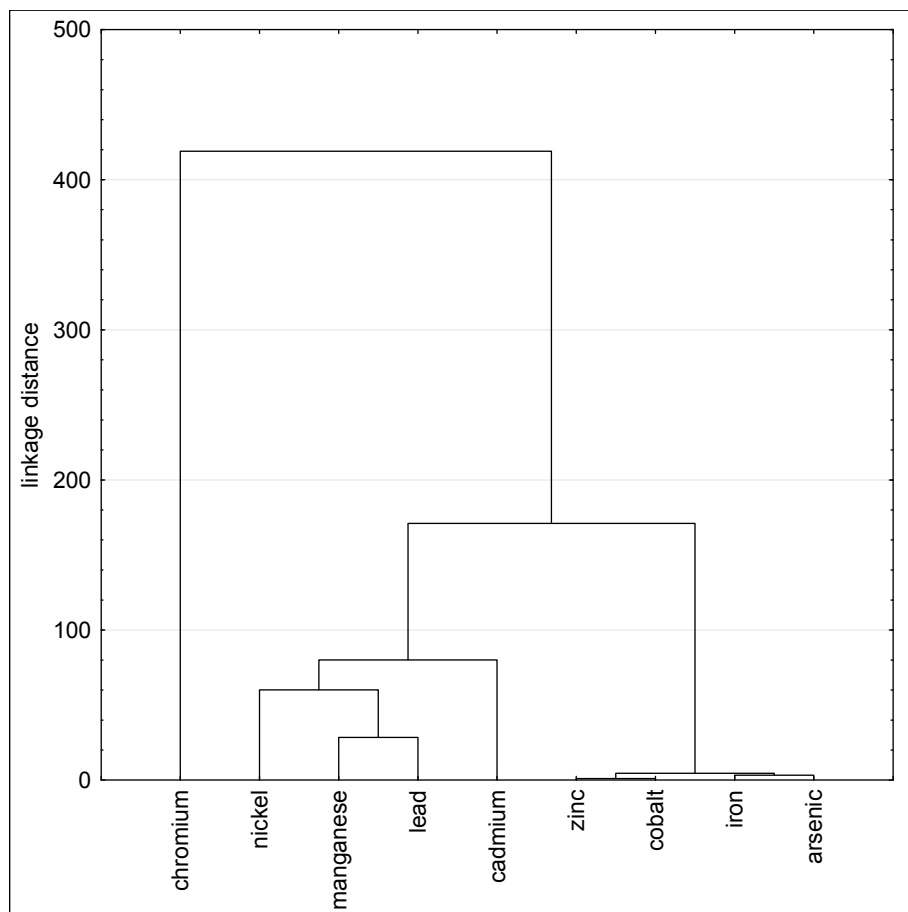

(a)

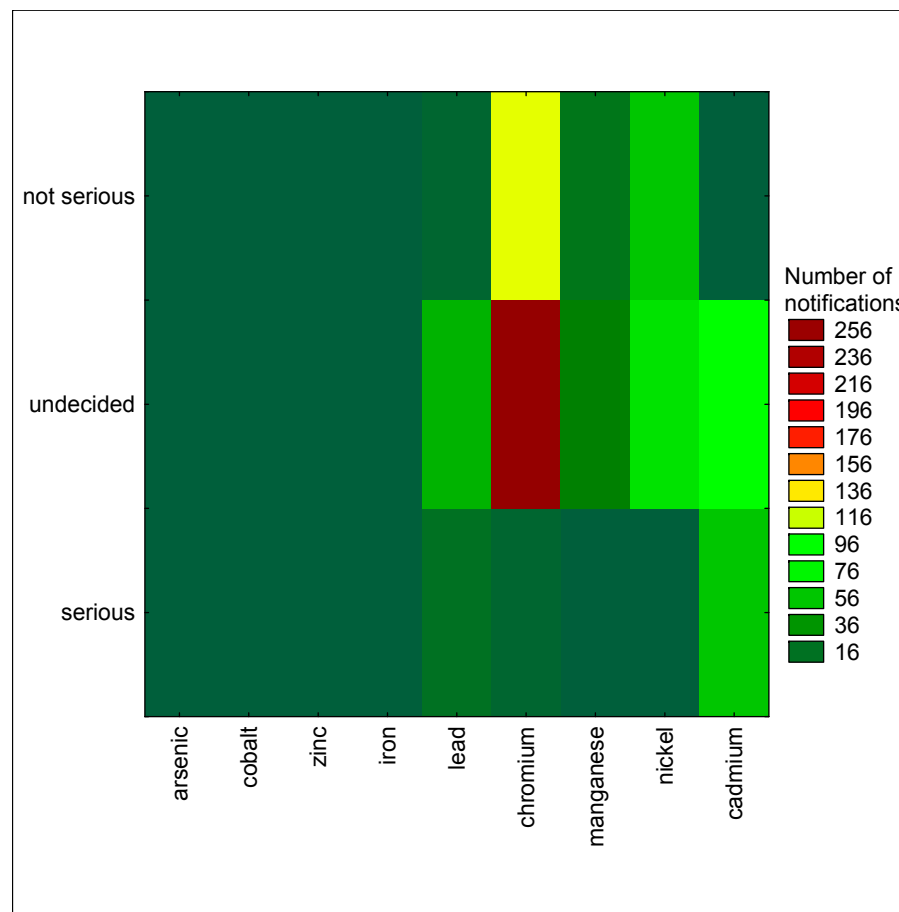

(b)

Figure S16: Similarities of RASFF notifications on heavy metals and risk decision within food contact material: (a) joining; (b) two-way joining.



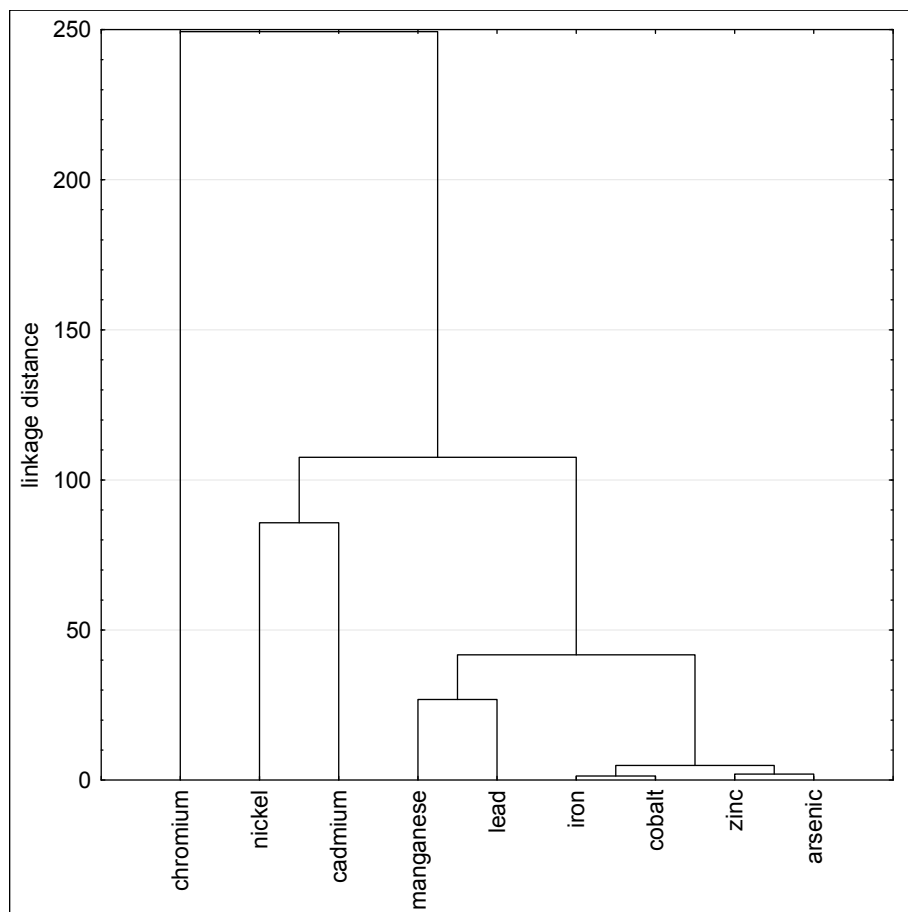

(a)

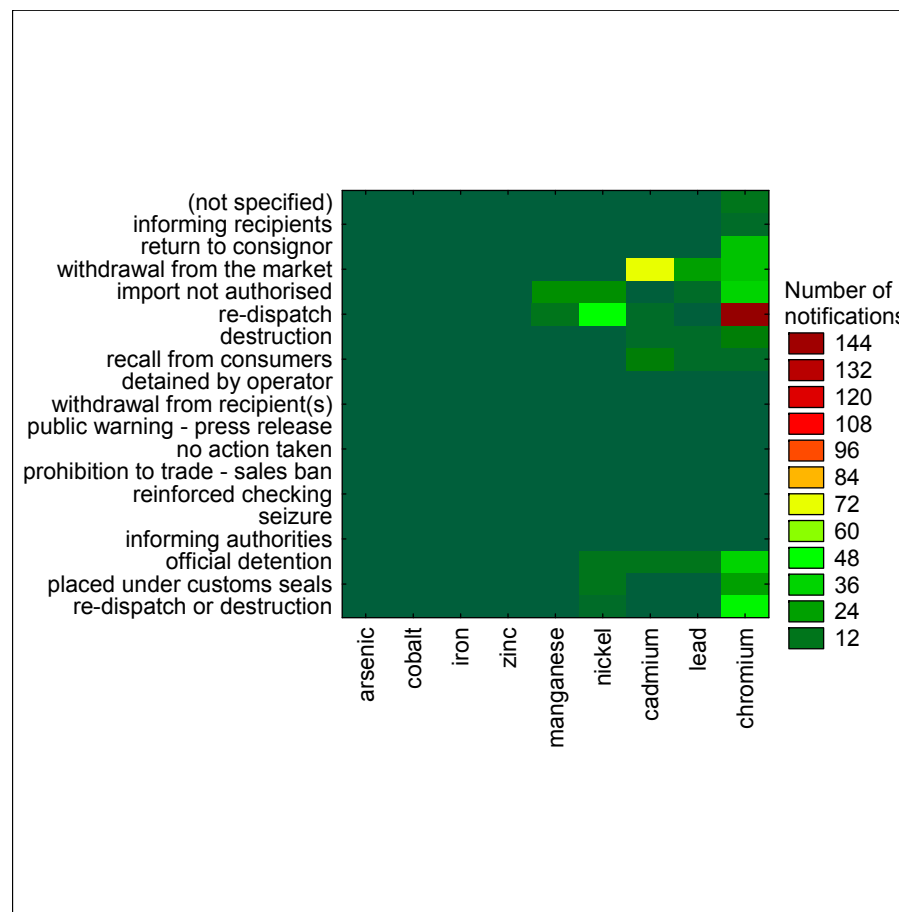

(b)

Figure S17: Similarities of RASFF notifications on heavy metals and action taken within food contact material: (a) joining; (b) two-way joining.

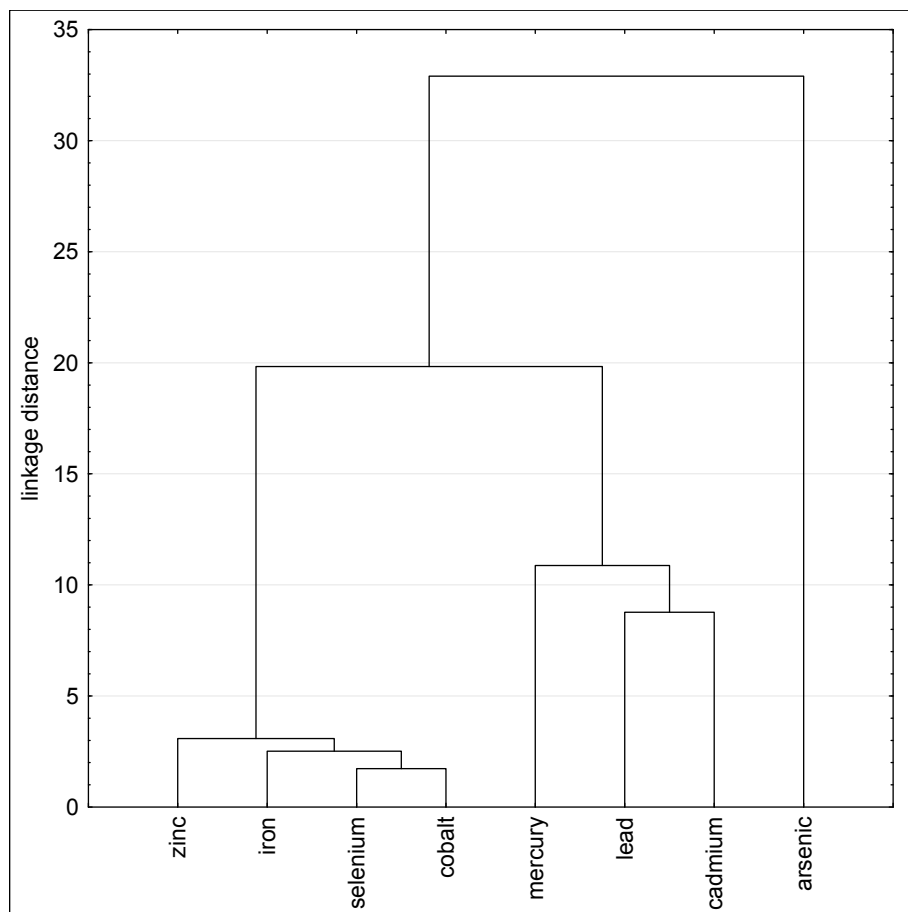

(a)

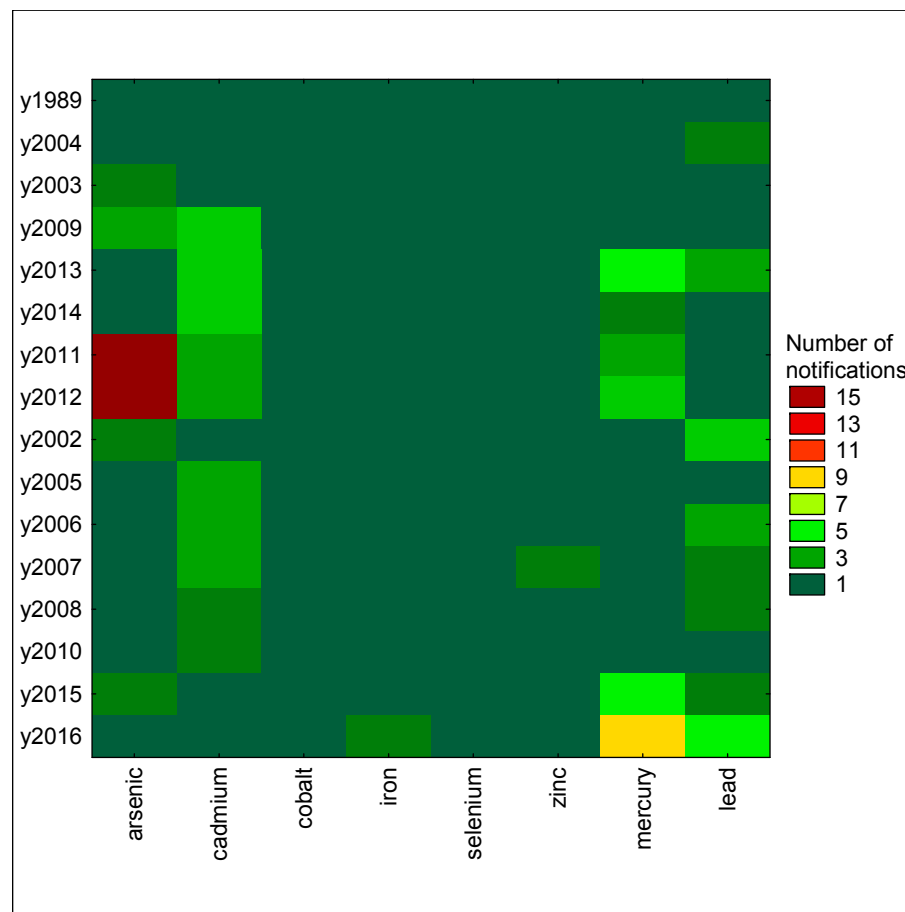

(b)

Figure S18: Similarities of RASFF notifications on heavy metals and year within food: (a) joining; (b) two-way joining.

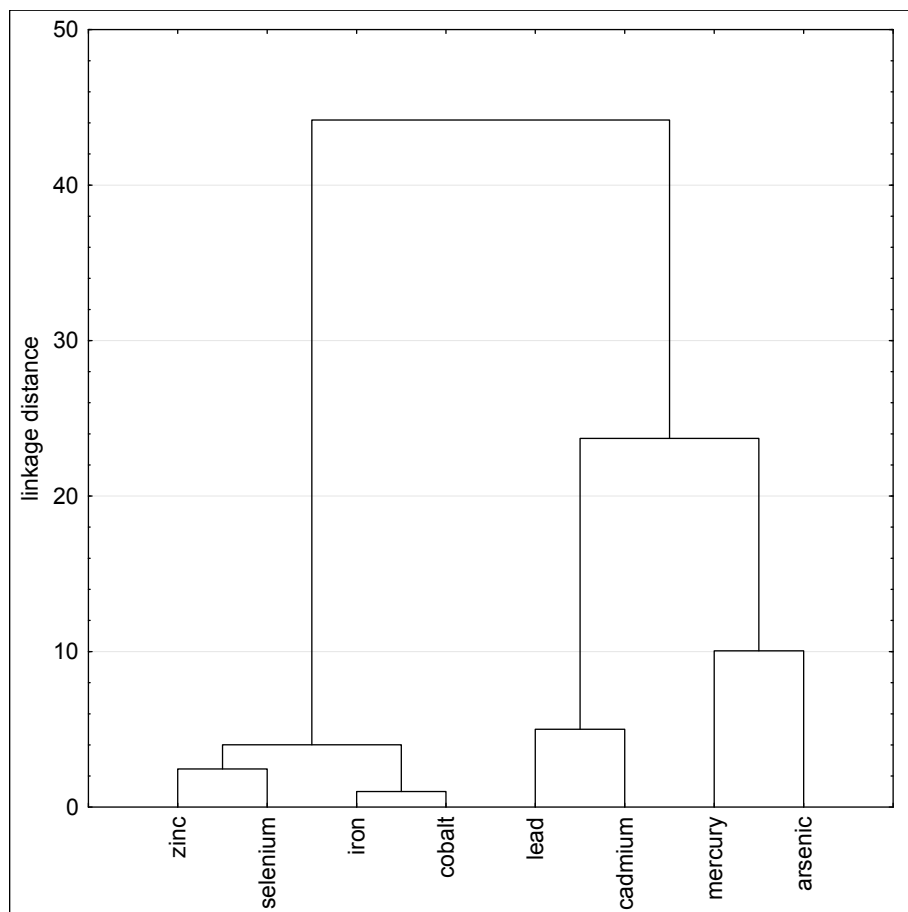

(a)

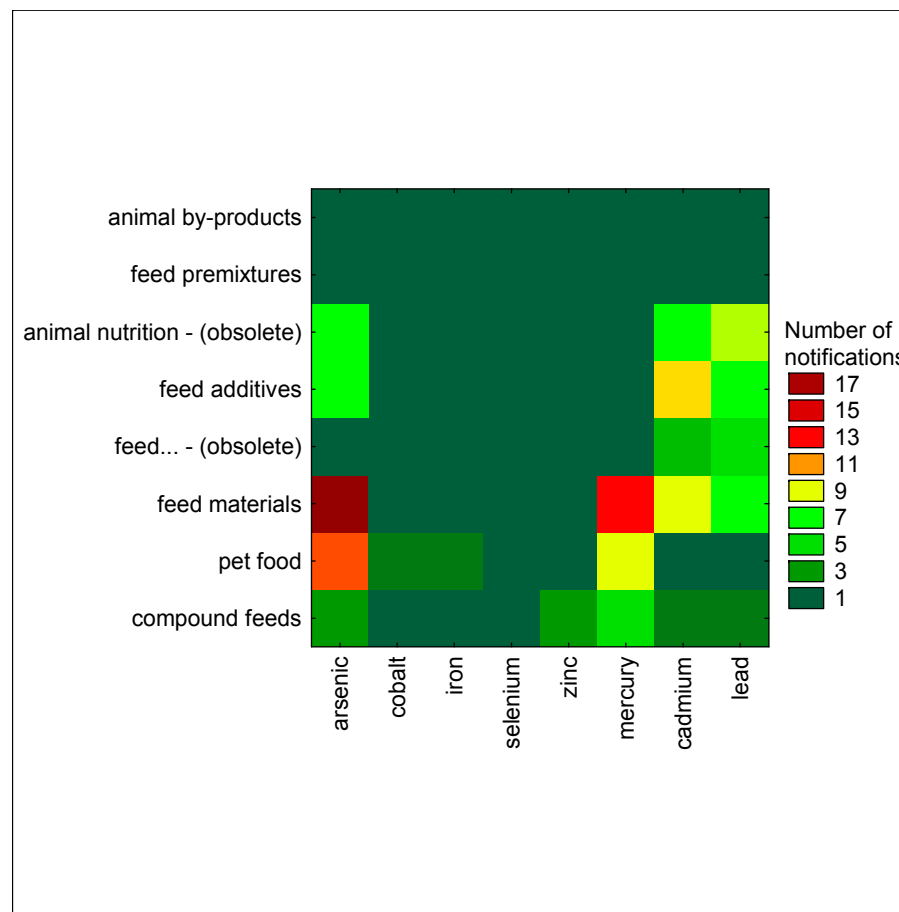

(b)

Figure S19: Similarities of RASFF notifications on heavy metals and product category within feed: (a) joining; (b) two-way joining.

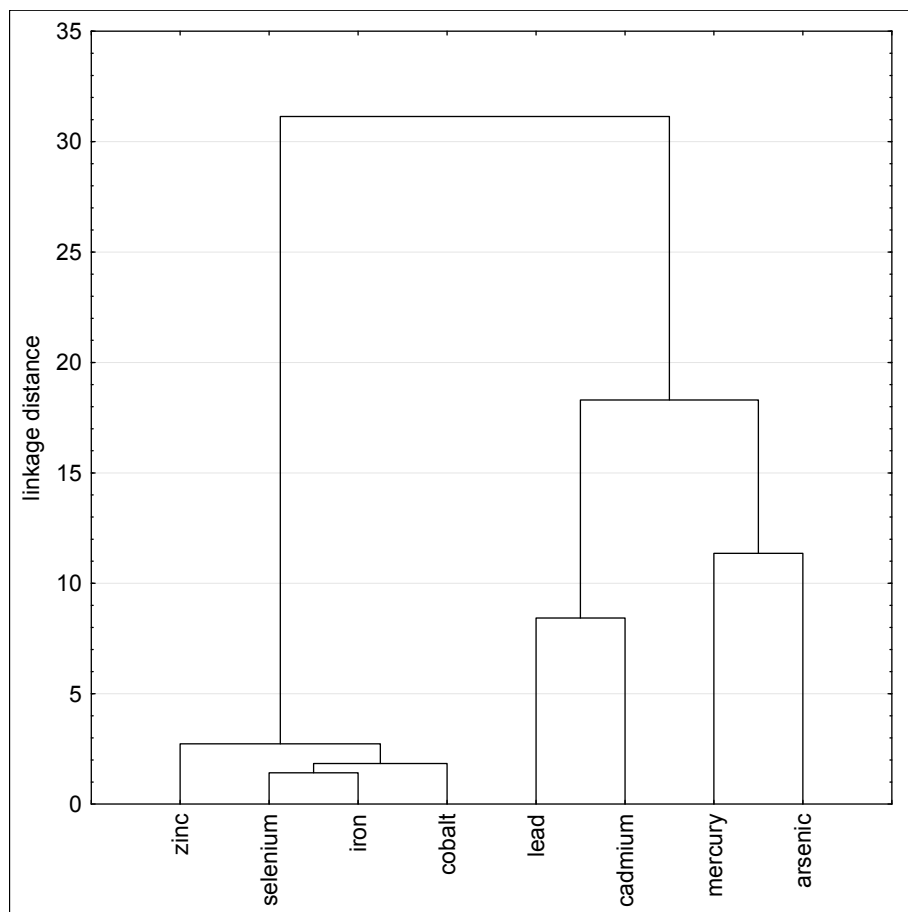

(a)

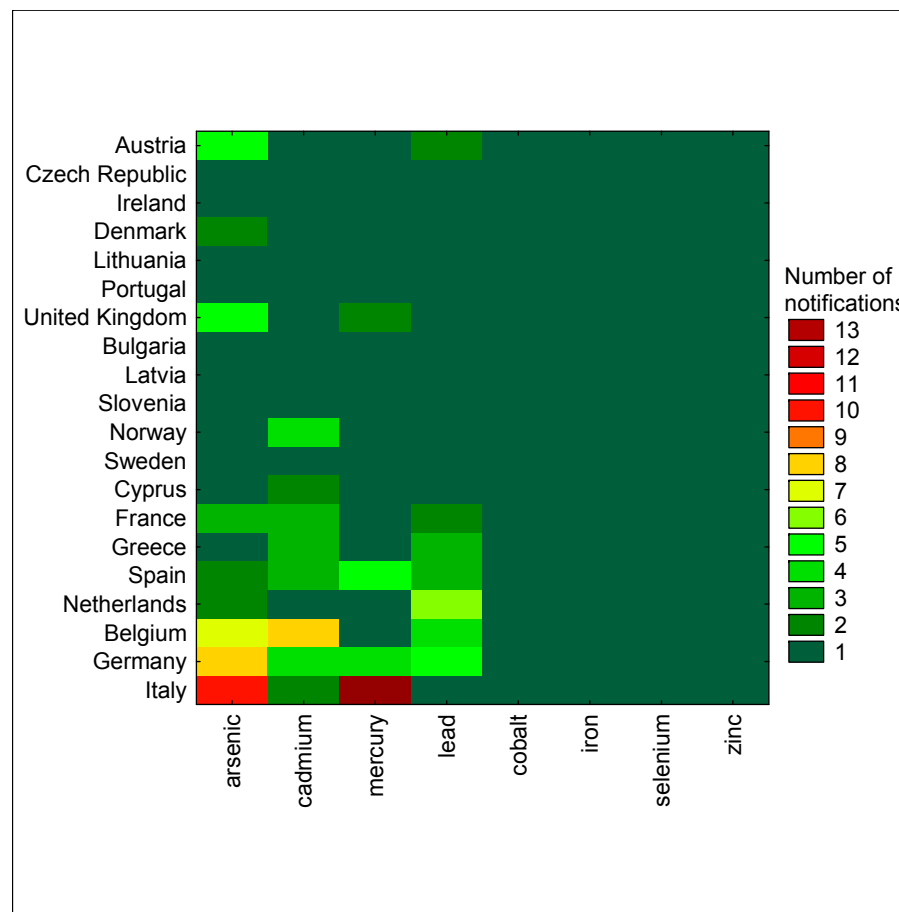

(b)

Figure S20: Similarities of RASFF notifications on heavy metals and notifying country within feed: (a) joining; (b) two-way joining.

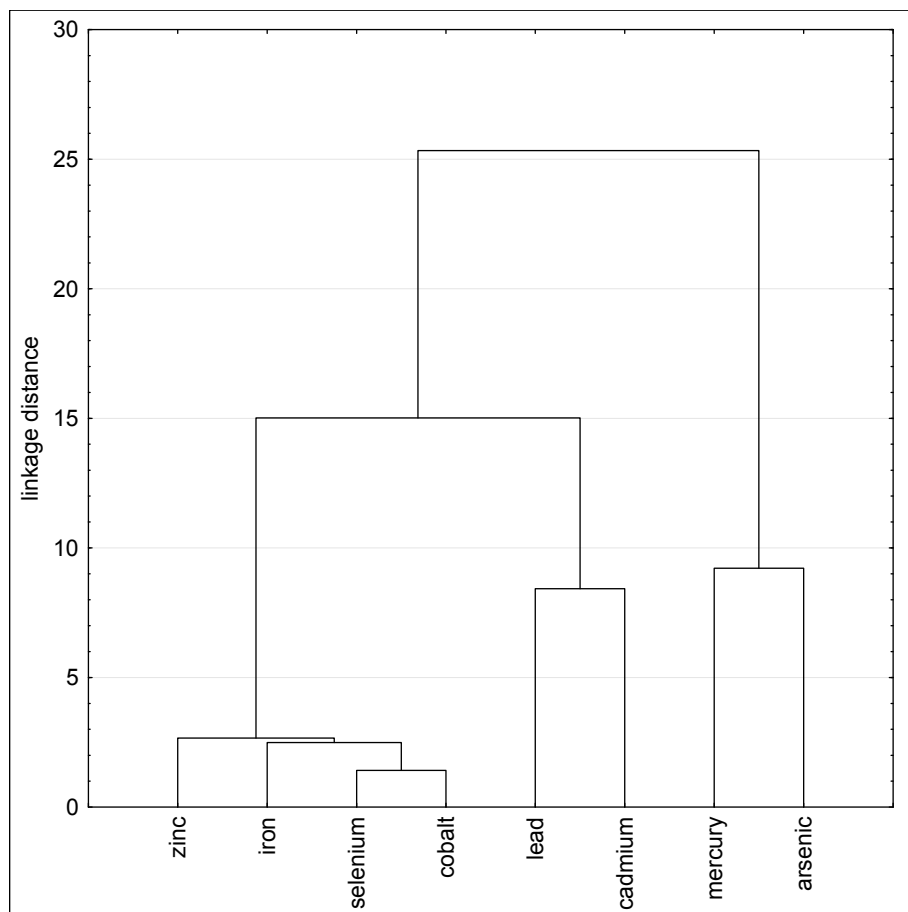

(a)

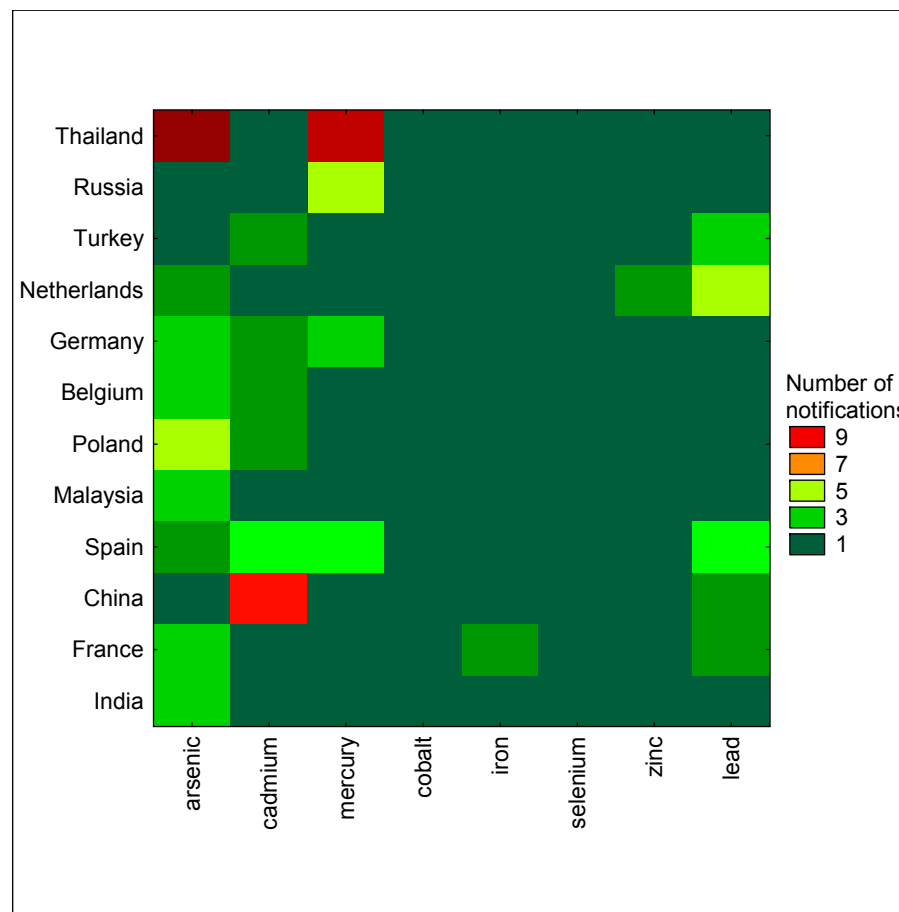

(b)

Figure S21: Similarities of RASFF notifications on heavy metals and origin country within feed: (a) joining; (b) two-way joining.

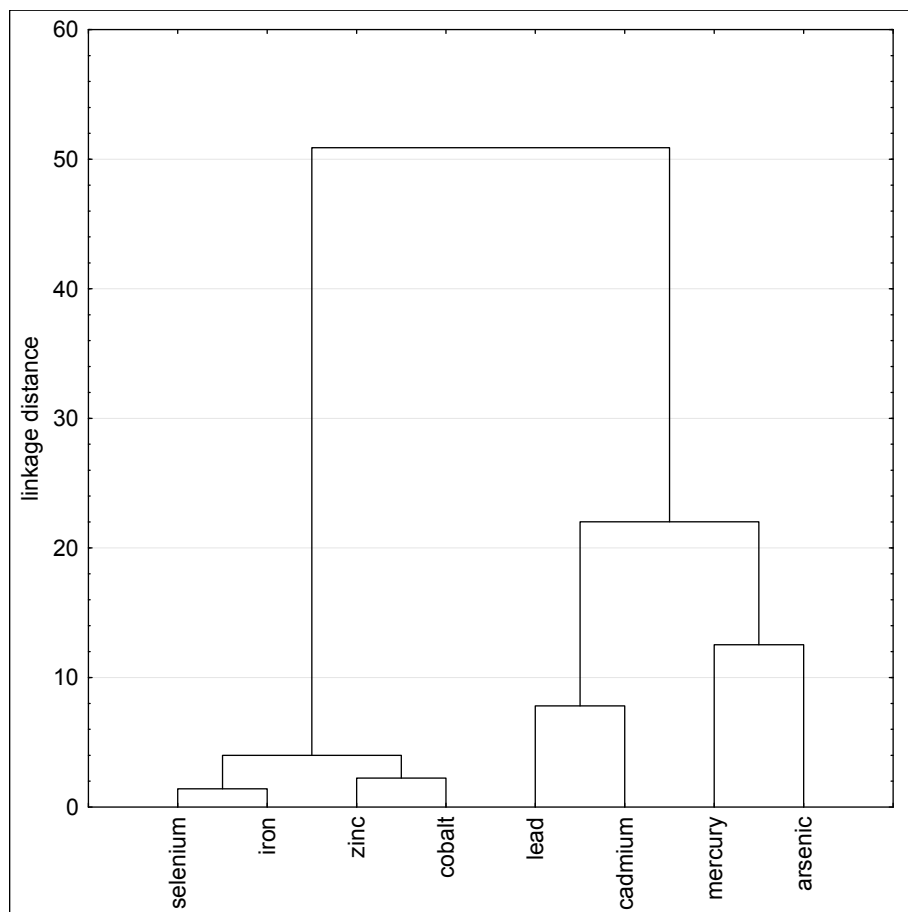

(a)

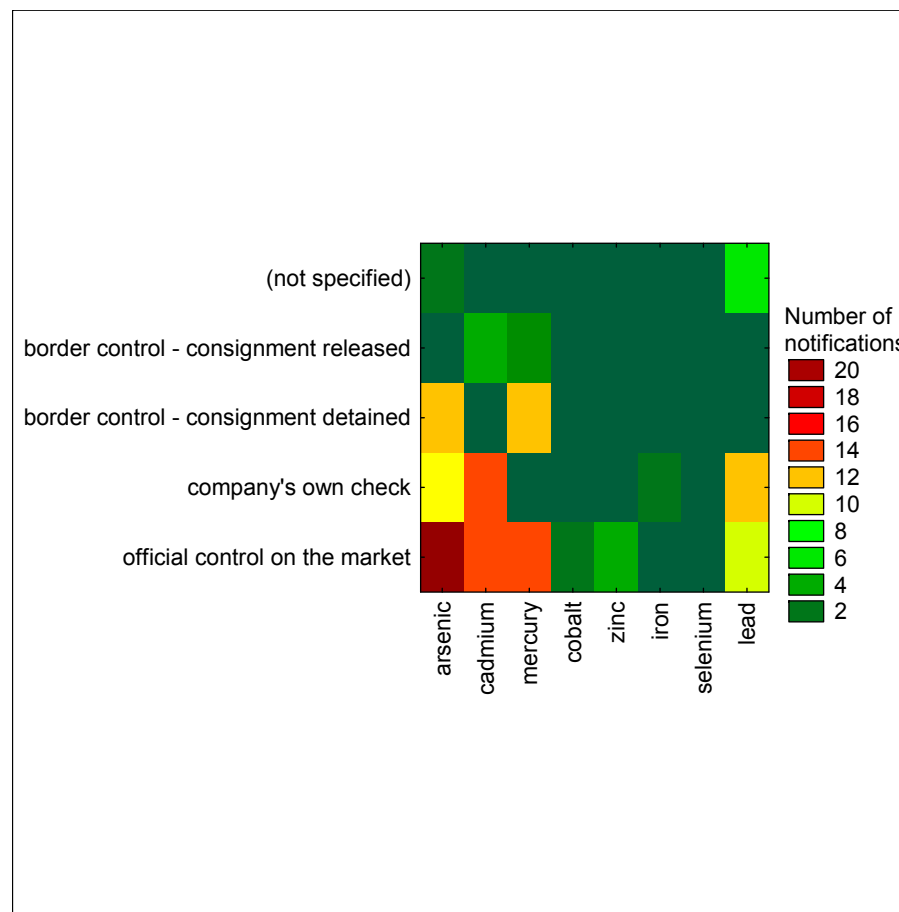

(b)

Figure S22: Similarities of RASFF notifications on heavy metals and notification basis within feed: (a) joining; (b) two-way joining.

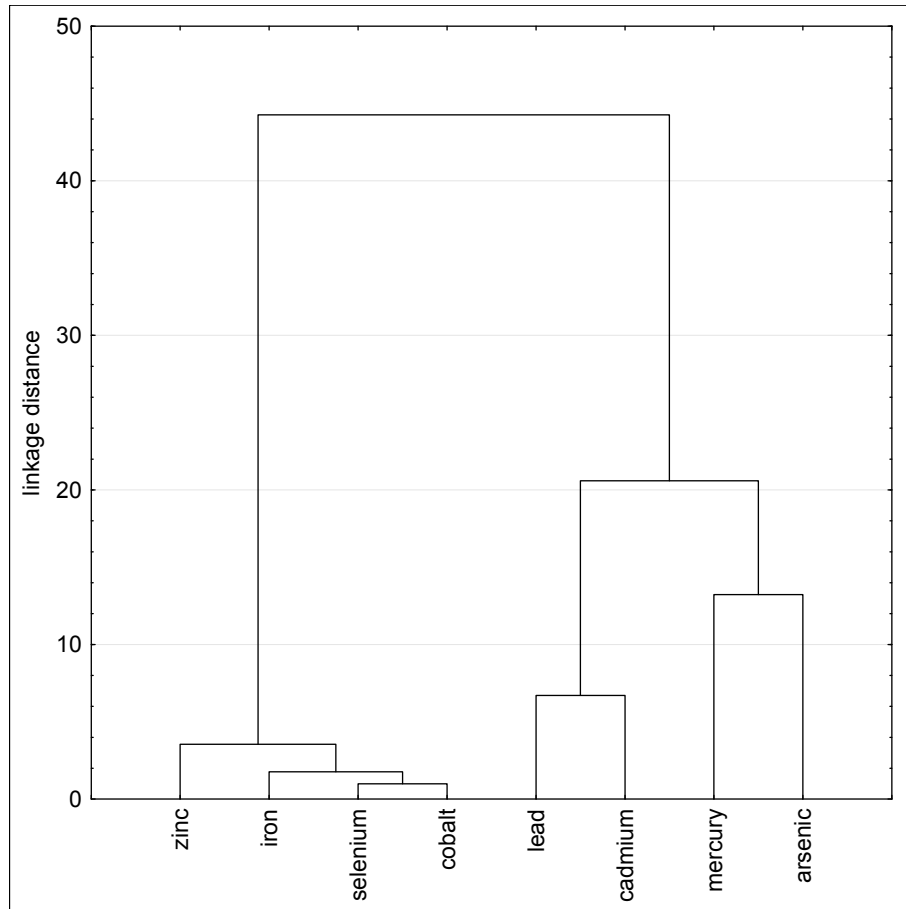

(a)

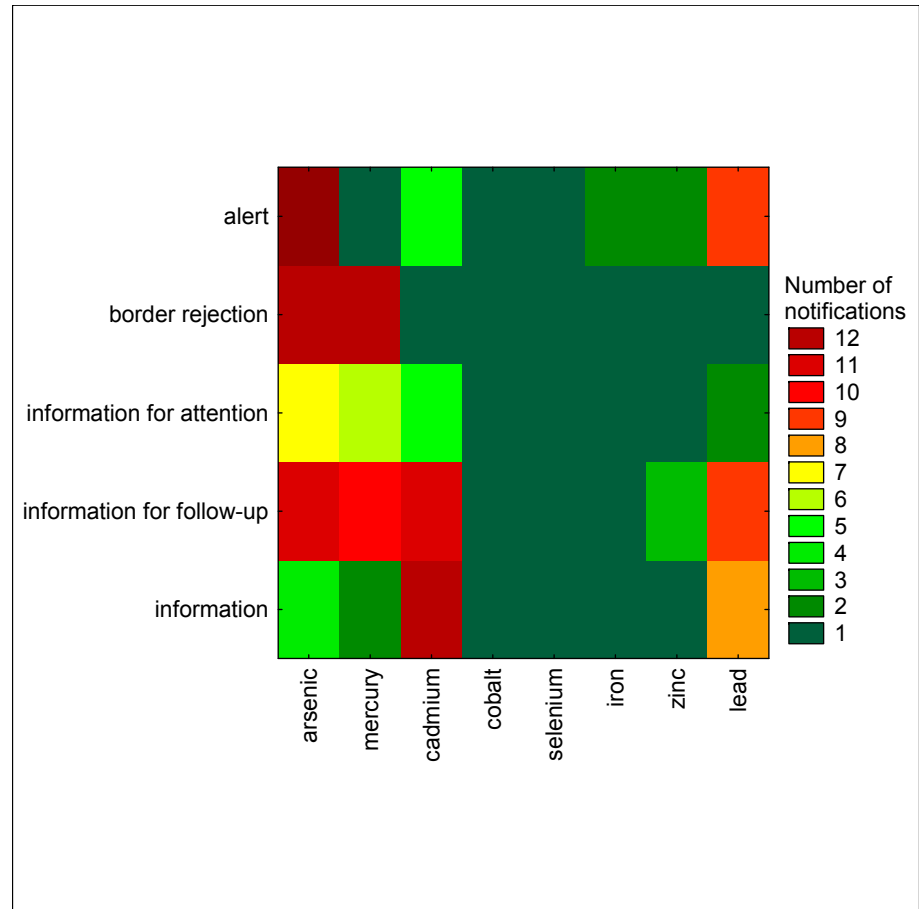

(b)

Figure S23: Similarities of RASFF notifications on heavy metals and notification type within feed: (a) joining; (b) two-way joining.



(a)

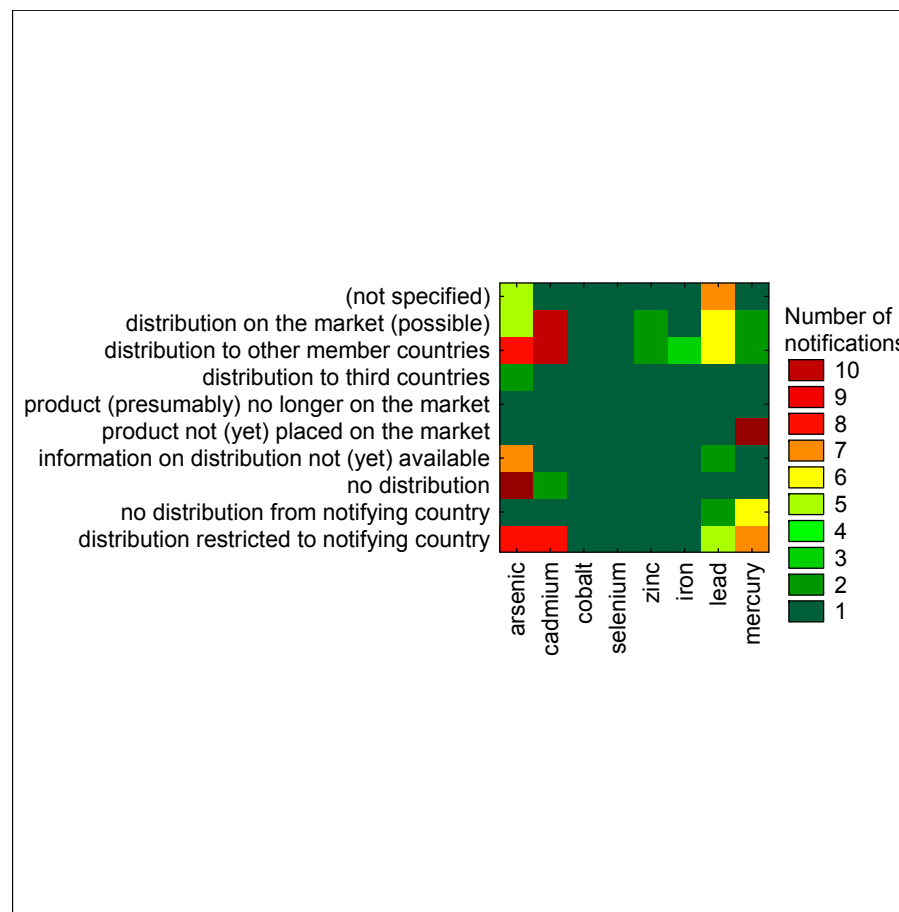

(b)

Figure S24: Similarities of RASFF notifications on heavy metals and distribution status within feed: (a) joining; (b) two-way joining.



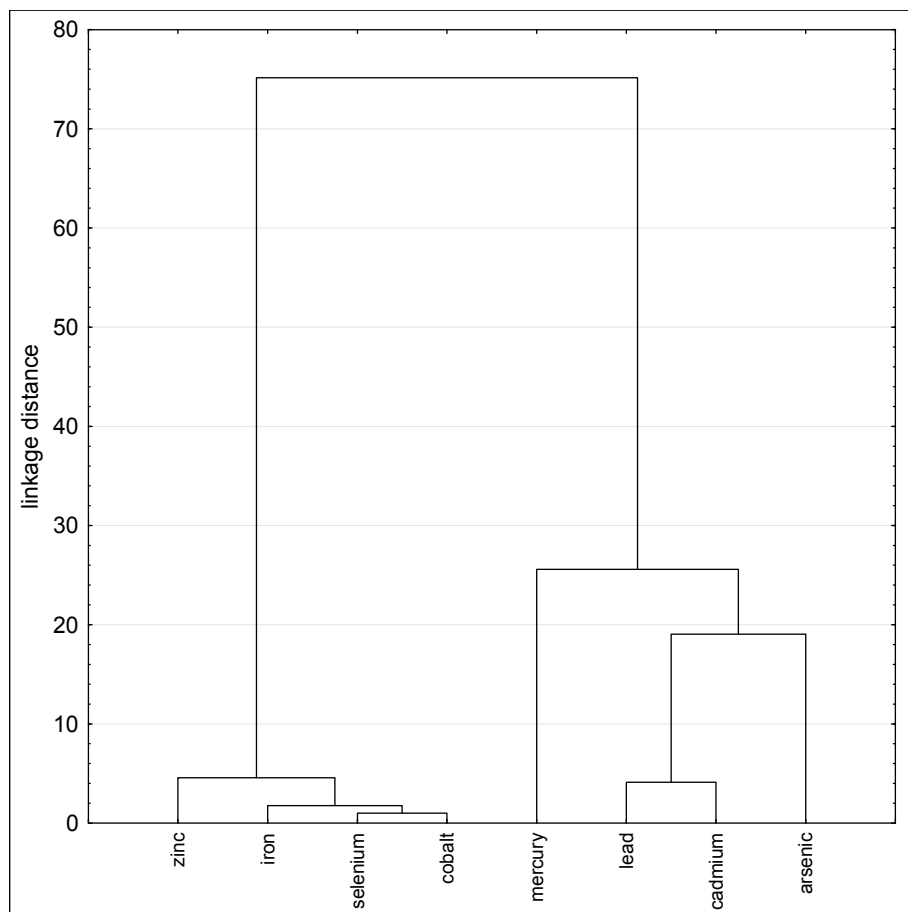

(a)

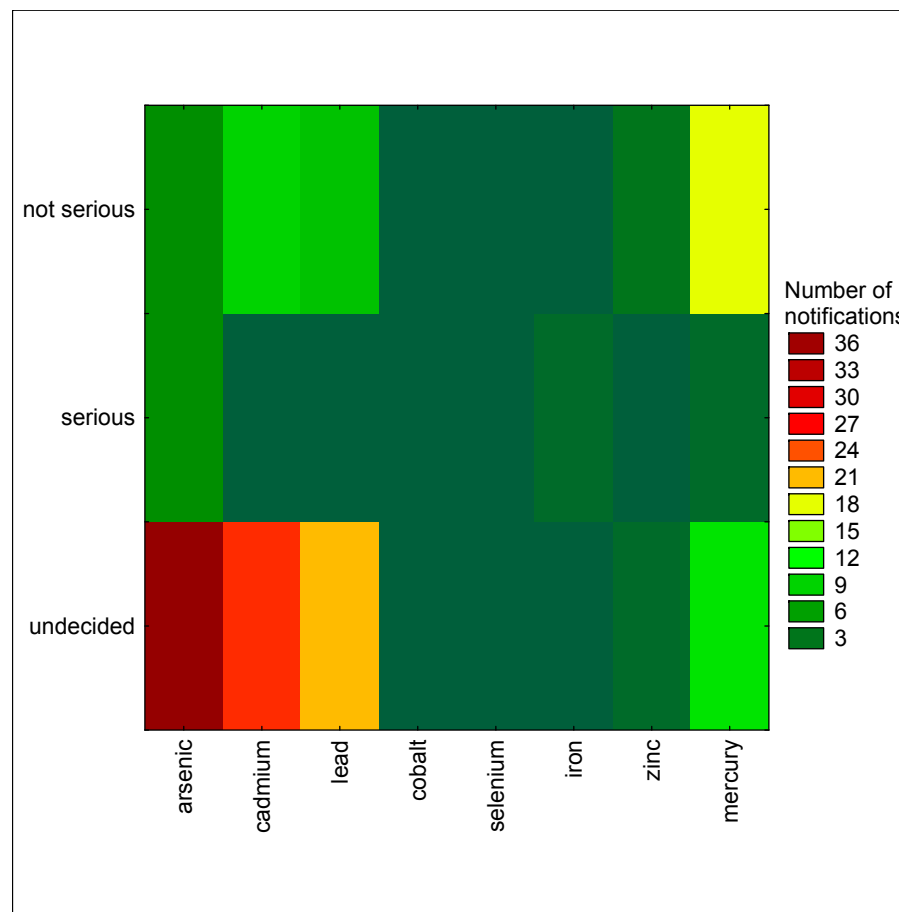

(b)

Figure S25: Similarities of RASFF notifications on heavy metals and risk decision within feed: (a) joining; (b) two-way joining.

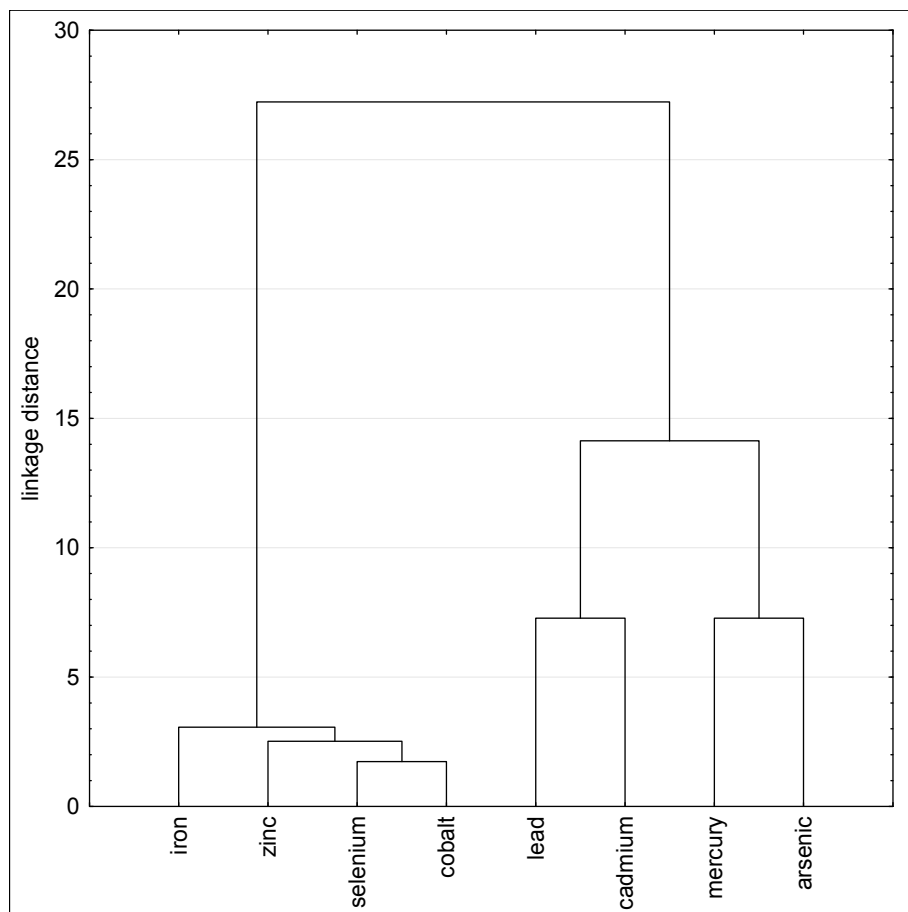

(a)

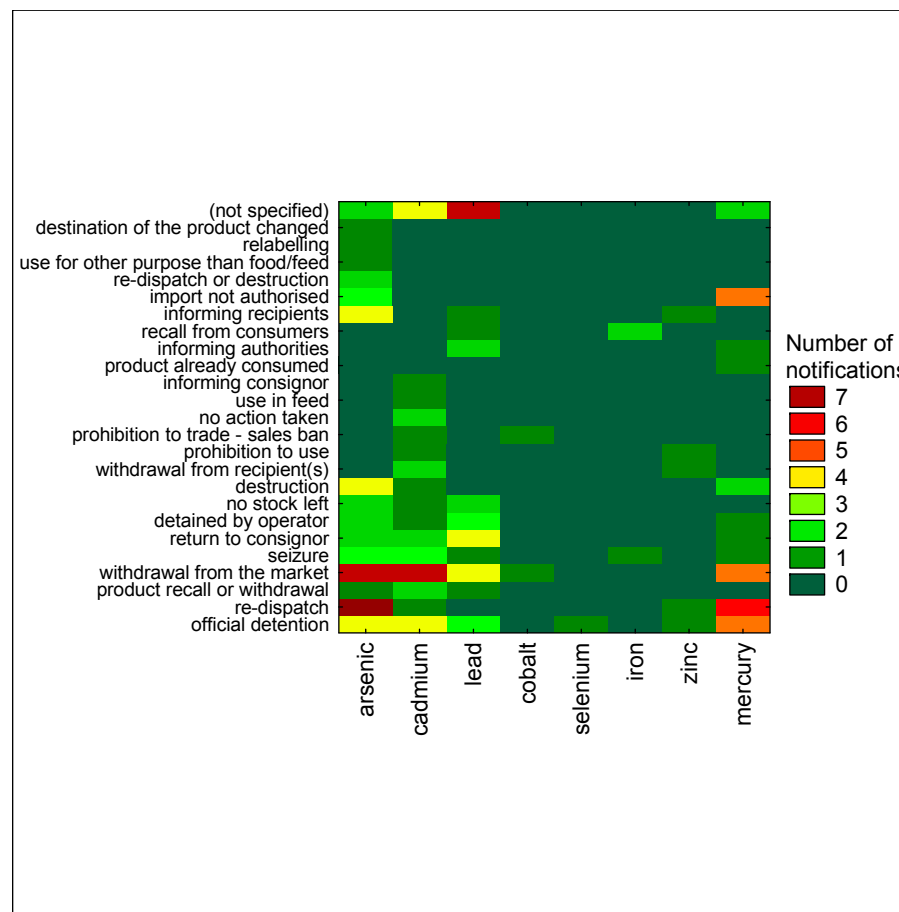

(b)

Figure S26: Similarities of RASFF notifications on heavy metals and action taken within feed: (a) joining; (b) two-way joining.

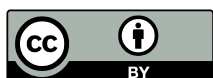

© 2018 by the authors. Submitted for possible open access publication under the terms and conditions of the Creative Commons Attribution (CC BY) license (<http://creativecommons.org/licenses/by/4.0/>).
